# Supplementary material for: A ppm level Rh-based composite as an ecofriendly catalyst for transfer hydrogenation of nitriles: triple guarantee of selectivity for primary amines
Source: Royal Society of Chemistry journal article supplement (doi:10.1039/c8gc03595d), 2019-01-01
Supplement: c8gc03595d1.pdf [file c8gc03595d1.pdf]

*Supporting Information for:*

**A ppm level Rh based composites as ecofriendly catalyst for transfer hydrogenation of Nitriles:  
Triple guarantee of selectivity for primary amine**

Lei Liu<sup>a,b,†</sup>, Jifan Li<sup>b,c,†</sup>, Yongjian Ai<sup>c</sup>, Yuhong Liu<sup>a,\*</sup>, Jialiang Xiong<sup>c</sup>, Hongdong Wang<sup>a</sup>, Yijun Qiao<sup>a</sup>, Wenrui Liu<sup>a</sup>, Shanchao Tan<sup>a</sup>, Shaofei Feng<sup>a</sup>, Kunpeng Wang<sup>a</sup>, Hongbin Sun<sup>b,\*</sup> and Qionglin Liang<sup>c,\*</sup>.

<sup>a</sup> State Key Laboratory of Tribology, Tsinghua University, Beijing 100084, People's Republic of China

<sup>b</sup> Department of Chemistry, Northeastern University, Shenyang 110819, People's Republic of China

<sup>c</sup> Key Laboratory of Bioorganic Phosphorus Chemistry & Chemical Biology (Ministry of Education), Department of Chemistry, Tsinghua University, Beijing 100084, People's Republic of China

<sup>†</sup>This work was contributed equally by these authors.

E-mail: liuyuhong@tsinghua.edu.cn; sunhb@mail.neu.edu.cn; liangql@mail.tsinghua.edu.cn

**Contents**

|                                                                                                      |           |
|------------------------------------------------------------------------------------------------------|-----------|
| <b>1. Experimental section.....</b>                                                                  | <b>2</b>  |
| <b>2. Figure S1. The regular pore structure of the catalyst in HRTEM image.....</b>                  | <b>3</b>  |
| <b>3. Figure S2. The EDX characterization of the catalyst.....</b>                                   | <b>4</b>  |
| <b>4. Figure S3. The N<sub>2</sub>-adsorption-desorption isotherm of the analogous catalyst.....</b> | <b>5</b>  |
| <b>5. Characterization data of products.....</b>                                                     | <b>6</b>  |
| <b>6. Copies of 1H and 13C NMR spectrums.....</b>                                                    | <b>9</b>  |
| <b>7. Reference.....</b>                                                                             | <b>25</b> |

## Experimental section

**Preparation of  $\text{Fe}_3\text{O}_4@\text{nSiO}_2\text{-NH}_2$ .** Firstly,  $\text{Fe}_3\text{O}_4$  nanosphere purchased from Aladdin Reagent Co., Ltd., China. (0.2 g) was activated with 0.1 mol/L HCl solution (60 mL) in ultrasonic vibrator for 30 minutes. After washing the magnetite three times with deionized water, it was redispersed in the mixed solution that contained deionized  $\text{H}_2\text{O}$  (40 mL), ethanol (160 mL), and 25%  $\text{NH}_3\cdot\text{H}_2\text{O}$  (4 mL). When one milliliter of TEOS was added dropwise, the mixture was stirred vigorously for 6 hours under ambient temperature accompanied by multiple ultrasounds. After magnetic separation from the suspension the solid were functionalized with  $-\text{NH}_2$  through reaction with APTES (0.5 mL) in isopropanol (200 mL) at 80 °C for 3 h. Then the  $\text{Fe}_3\text{O}_4@\text{nSiO}_2\text{-NH}_2$  nanocomposite was successfully fabricated after isolation by an external magnet and washing with ethanol.

**Preparation of  $\text{Fe}_3\text{O}_4@\text{nSiO}_2\text{-NH}_2\text{-RhCu@mSiO}_2$ .** The obtained  $\text{Fe}_3\text{O}_4@\text{nSiO}_2\text{-NH}_2$  was stirred vigorously in the homogeneous solution that contains  $\text{RhCl}_3 \cdot 3\text{H}_2\text{O}$  (1 mg),  $\text{Cu}(\text{NO}_3)_2 \cdot 6\text{H}_2\text{O}$  (1 mmol),  $\text{H}_2\text{O}$  (100 mL), ethanol (90 mL) for 1 hour. Subsequently, 10 mL methanol solution of 0.2 g  $\text{NaBH}_4$  was quickly added under Ar atmosphere. After continuous stirring for 1 h, the resulting solid was redispersed in 80 mL  $\text{H}_2\text{O}$ . Meanwhile, 2.5 mL  $\text{NH}_3\cdot\text{H}_2\text{O}$  were injected to the transparent solution of CTAB (0.32 g) and 60 mL ethanol. This solution was then added into the above suspension and the mixture were stirred for 30 min. When 1.5 mL TEOS were dropped in, the system was vigorously stirred for 6 h under ambient temperature. Then the collected solid via magnetic separation were stirred vigorously in 150 mL boiling ethanol for 3 h and three times in succession to remove CTAB. The ultimate material was obtained through washing with ethanol and drying.

**Typical procedure for the synthesis of benzylamine:** FS- $\text{NH}_2\text{-RhCu@mSiO}_2$  (10 mg), benzonitrile (1 mmol) and  $\text{HCOOH}\cdot\text{NEt}_3$  (20:1, 2 mL) were successively added to a tube (15 mL) and the reactor was immediately sealed and heated at 40 °C for 3 hour. After the tube was cooled with ice water to quench the reaction, the conversion and selectivity were acquired by GC with toluene as the internal standard. The reaction liquid was firstly extracted with  $\text{H}_2\text{O}$  (30 mL) and  $\text{CH}_2\text{Cl}_2$  (10 mL). The aqueous phase was adjusted to alkaline by adding sodium hydroxide and subsequently extracted with  $\text{H}_2\text{O}$  (10 mL) and  $\text{CH}_2\text{Cl}_2$  (30 mL). The organic phase was concentrated in vacuum after desiccation with anhydrous  $\text{Na}_2\text{SO}_4$ . The residue was purified by flash column chromatography on silica gel ( $\text{SiO}_2$ , petroleum ether/EtOAc, 2:1) to afford the benzylamine.

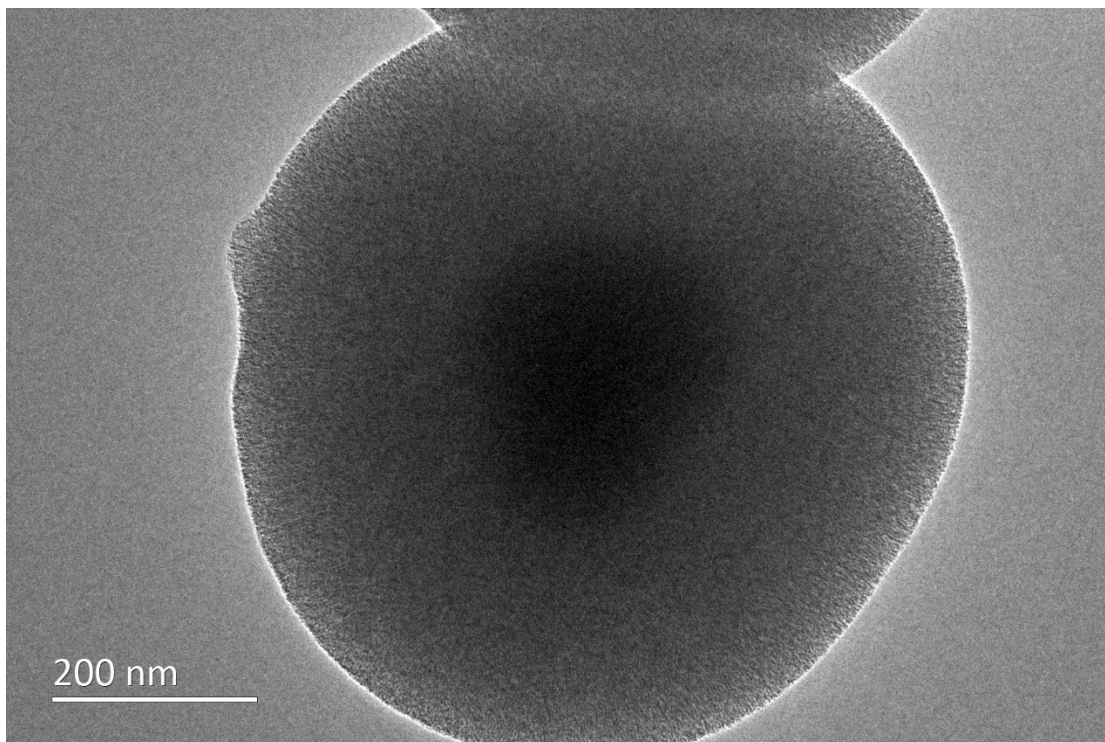

Figure S1. The regular pore structure of the catalyst in HRTEM image.

We can easily distinguish the pore structure of the material, which is significant to the mass transfer process.

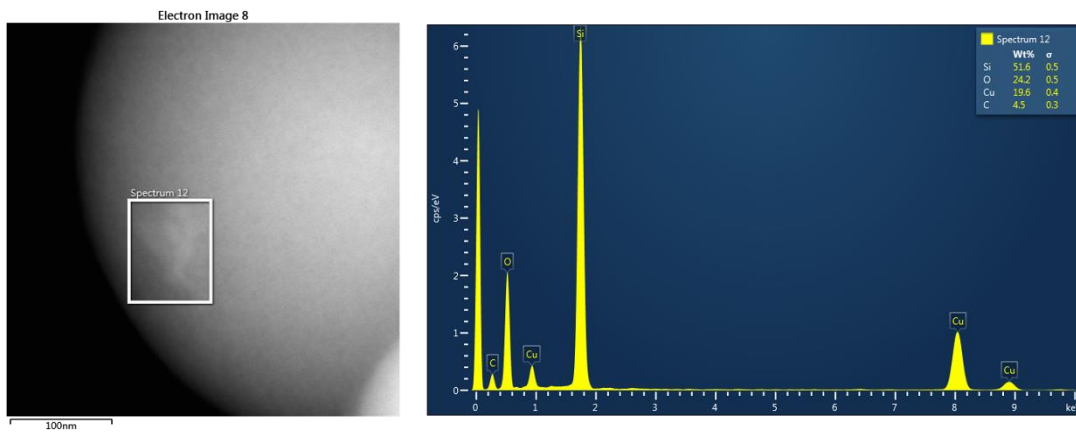

Figure S2. The EDX characterization of the catalyst.

We characterized the metal particle we struggled to find with EDX system. The results showed only the presence of copper element. The possible reasons are as follows: the level of rhodium belows the detection limit of this system (the existence of rhodium is verified according to SAED and ICP-MS characterization), and most of the active sites may exist as ultra-small particles because it's hard to find another metal particle in HRTEM. And the thickness of the silicon shell is also a factor.

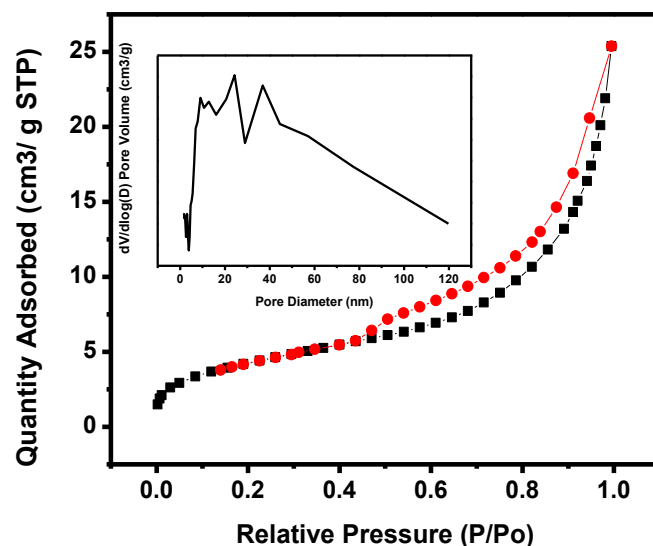

Figure S3. The N<sub>2</sub>-adsorption-desorption isotherm of the analogous catalyst fabricated by etching.

The N<sub>2</sub>-adsorption-desorption isotherm of the analogous catalyst belongs to a type IV classification coupling with a H3 hysteresis loop, indicating mesoporous structure with an average pore diameter of 10.7 nm calculated by the Barrett- Joyner-Halenda model. Under the same reaction conditions, the selectivity was reduced by 9 percent, indicating that the pore structure affected the reaction selectivity.

## Characterization data of products

### Benzylamine (**1a**)<sup>1</sup>

<sup>1</sup>H NMR (600 MHz, CHLOROFORM-D)  $\delta$  7.30 – 7.25 (m, 5H), 3.83 (s, 2H), 2.03 (s, active H).

<sup>13</sup>C NMR (151 MHz, CHLOROFORM-D)  $\delta$  129.0, 128.8, 128.63, 127.79, 45.40.

GC-MS: m/z(%) 51(11), 79(49), 106(100), HRMS Calcd. (ESI) m/z for C<sub>7</sub>H<sub>9</sub>N: [M+H]<sup>+</sup> 108.0808, found 108.0803

IR (KBr) cm<sup>-1</sup>: 880, 1460, 1520, 2851, 2930, 3040, 3300, 3380.

### p-tolylmethanamine (**2a**)<sup>2</sup>

<sup>1</sup>H NMR (600 MHz, CHLOROFORM-D)  $\delta$  7.20 (d, *J* = 7.9 Hz, 2H), 7.14 (d, *J* = 7.8 Hz, 2H), 3.82 (s, 2H), 2.34 (s, 3H), 1.74 (s, active H).

<sup>13</sup>C NMR (151 MHz, CHLOROFORM-D)  $\delta$  140.03, 136.46, 129.23, 127.09, 46.16, 21.06.

GC-MS: m/z(%) 65(30), 77(45), 104(100), 120(65), HRMS Calcd. (ESI) m/z for C<sub>8</sub>H<sub>11</sub>N: [M+H]<sup>+</sup> 122.0964, found 122.0960

IR (KBr) cm<sup>-1</sup>: 870, 1450, 1515, 2850, 2930, 3030, 3310, 3390.

### m-tolylmethanamine (**3a**)<sup>2</sup>

<sup>1</sup>H NMR (600 MHz, CHLOROFORM-D)  $\delta$  7.23 (t, *J* = 7.4 Hz, 1H), 7.14 – 7.09 (m, 2H), 7.07 (d, *J* = 6.8 Hz, 1H), 3.83 (s, 2H), 2.35 (s, 3H), 1.98 (s, 2H).

<sup>13</sup>C NMR (151 MHz, CHLOROFORM-D)  $\delta$  138.24, 131.57, 128.50, 127.98, 127.66, 124.20, 46.31, 21.39.

GC-MS: m/z(%) 65(30), 77(45), 104(100), 120(65), HRMS Calcd. (ESI) m/z for C<sub>8</sub>H<sub>11</sub>N: [M+H]<sup>+</sup> 122.0964, found 122.0969

IR (KBr) cm<sup>-1</sup>: 850, 1450, 1495, 2861, 2920, 3030, 3310, 3390.

### o-tolylmethanamine (**4a**)<sup>2</sup>

<sup>1</sup>H NMR (600 MHz, CHLOROFORM-D)  $\delta$  7.31 (d, *J* = 7.2 Hz, 1H), 7.22 (d, *J* = 7.5 Hz, 1H), 7.19 (s, 1H), 7.17 (d, *J* = 2.1 Hz, 1H), 3.87 (s, 2H), 2.34 (s, 3H), 1.89 (s, 2H).

<sup>13</sup>C NMR (151 MHz, CHLOROFORM-D)  $\delta$  140.50, 135.55, 130.32, 127.15, 126.96, 126.22, 43.91, 18.83.

GC-MS: m/z(%) 65(30), 77(45), 104(100), 120(65), HRMS Calcd. (ESI) m/z for C<sub>8</sub>H<sub>11</sub>N: [M+H]<sup>+</sup> 122.0964, found 122.0959

IR (KBr) cm<sup>-1</sup>: 860, 1456, 1505, 2850, 2930, 3030, 3310, 3390.

### (3,5-dimethylphenyl)methanamine (**5a**)

<sup>1</sup>H NMR (600 MHz, CHLOROFORM-D)  $\delta$  6.90 (s, 2H), 6.87 (s, 1H), 3.75 (s, 2H), 2.30 (s, 6H), 1.97 (s, 2H).

<sup>13</sup>C NMR (151 MHz, CHLOROFORM-D)  $\delta$  143.04, 138.08, 128.43, 124.93, 46.31, 21.25.

GC-MS: m/z(%) 65(20), 77(35), 91(65), 118(100), HRMS Calcd. (ESI) m/z for C<sub>9</sub>H<sub>13</sub>N: [M+H]<sup>+</sup> 136.1121, found 136.1117

IR (KBr) cm<sup>-1</sup>: 860, 1453, 1513, 2860, 2940, 3033, 3311, 3385.

### (4-methoxyphenyl)methanamine (**6a**)<sup>2</sup>

<sup>1</sup>H NMR (600 MHz, CHLOROFORM-D)  $\delta$  7.21 (d, *J* = 8.6 Hz, 2H), 6.86 (d, *J* = 8.6 Hz, 2H), 3.78 (s, 3H), 3.78 (s, 2H), 1.83 (s, 2H).

<sup>13</sup>C NMR (151 MHz, CHLOROFORM-D)  $\delta$  158.52, 135.37, 128.29, 113.92, 55.27, 45.81.

GC-MS: m/z(%) 65(30), 77(55), 106(70), 136(100), 137(65), HRMS Calcd. (ESI) m/z for C<sub>8</sub>H<sub>11</sub>NO: [M+H]<sup>+</sup> 138.0913, found 138.0916

IR (KBr) cm<sup>-1</sup>: 820, 1450, 1520, 2851, 2933, 3050, 3308, 3391.

(3-methoxyphenyl)methanamine (**7a**)<sup>2</sup>

<sup>1</sup>H NMR (600 MHz, CHLOROFORM-D) δ 7.23 (t, *J* = 7.8 Hz, 1H), 6.90 – 6.84 (m, 2H), 6.77 (d, *J* = 10.3 Hz, 1H), 3.81 (s, 2H), 3.79 (s, 3H), 1.76 (s, 2H).

<sup>13</sup>C NMR (151 MHz, CHLOROFORM-D) δ 159.83, 144.89, 129.53, 119.32, 112.60, 112.22, 55.16, 46.40.

GC-MS: *m/z*(%) 65(30), 77(55), 106(70), 136(100), 137(65), HRMS Calcd. (ESI) *m/z* for C<sub>8</sub>H<sub>11</sub>NO: [M+H]<sup>+</sup> 138.0913, found 138.0909

IR (KBr) cm<sup>-1</sup>: 850, 1460, 1600, 2839, 2950, 3010, 3290, 3390.

(3,5-dimethoxyphenyl)methanamine (**8a**)

<sup>1</sup>H NMR (600 MHz, CHLOROFORM-D) δ 6.45 (s, 2H), 6.32 (s, 1H), 3.76 (s, 2H), 3.75 (s, 6H), 1.94 (s, 2H).

<sup>13</sup>C NMR (151 MHz, CHLOROFORM-D) δ 161.01, 145.73, 104.94, 98.76, 55.26, 46.53.

HRMS Calcd. (ESI) *m/z* for C<sub>9</sub>H<sub>13</sub>NO<sub>2</sub>: [M+H]<sup>+</sup> 168.1019, found 168.1015

IR (KBr) cm<sup>-1</sup>: 860, 1455, 1590, 2841, 2951, 3013, 3294, 3391.

(4-chlorophenyl)methanamine (**9a**)<sup>3</sup>

<sup>1</sup>H NMR (600 MHz, CHLOROFORM-D) δ 7.30 (d, *J* = 9.2 Hz, 2H), 7.25 (d, *J* = 8.4 Hz, 2H), 3.84 (s, 2H), 1.73 (s, active H).

<sup>13</sup>C NMR (151 MHz, CHLOROFORM-D) δ 141.56, 132.59, 128.70, 128.56, 45.82.

GC-MS: *m/z*(%) 51(25), 77(45), 106(100), 125(10), 140(35), HRMS Calcd. (ESI) *m/z* for C<sub>7</sub>H<sub>8</sub>ClN: [M+H]<sup>+</sup> 142.0418, found 142.0414

IR (KBr) cm<sup>-1</sup>: 800, 1490, 1600, 2850, 2900, 3030, 3290, 3370.

(2-chlorophenyl)methanamine (**10a**)<sup>1</sup>

<sup>1</sup>H NMR (600 MHz, CHLOROFORM-D) δ 7.38 (d, *J* = 7.7 Hz, 1H), 7.35 (d, *J* = 7.6 Hz, 1H), 7.24 (d, *J* = 7.3 Hz, 1H), 7.20 (t, *J* = 7.6 Hz, 1H), 3.94 (s, 2H), 2.29 (s, 2H).

<sup>13</sup>C NMR (151 MHz, CHLOROFORM-D) δ 139.86, 133.40, 129.58, 129.15, 128.39, 127.13, 44.33.

GC-MS: *m/z*(%) 51(25), 77(45), 106(100), 125(10), 140(35), HRMS Calcd. (ESI) *m/z* for C<sub>7</sub>H<sub>8</sub>ClN: [M+H]<sup>+</sup> 142.0418, found 142.0420

IR (KBr) cm<sup>-1</sup>: 750, 1490, 1610, 2860, 2900, 3050, 3300, 3390.

(3,4-difluorophenyl)methanamine (**11a**)

<sup>1</sup>H NMR (600 MHz, CHLOROFORM-D) δ 7.14 (d, *J* = 9.4 Hz, 1H), 7.10 (d, *J* = 10.2 Hz, 1H), 7.03 (s, 1H), 3.84 (s, 2H), 1.71 (s, active H).

<sup>13</sup>C NMR (151 MHz, CHLOROFORM-D) δ 150.37 (dd, *J* = 250 Hz, 12 Hz), 149.27 (dd, *J* = 249 Hz, 12 Hz), 140.10 (dd, *J* = 6 Hz, 4 Hz), 122.83 (dd, *J* = 7 Hz, 4 Hz), 117.33 (d, *J* = 18 Hz), 116.19 (d, *J* = 17 Hz), 45.44.

GC-MS: *m/z*(%) 63(40), 75(20), 95(15), 123(100), 142(65), HRMS Calcd. (ESI) *m/z* for C<sub>7</sub>H<sub>7</sub>F<sub>2</sub>N: [M+H]<sup>+</sup> 144.0619, found 144.0615

IR (KBr) cm<sup>-1</sup>: 790, 1460, 1610, 2850, 2930, 3010, 3310, 3380.

(4-(trifluoromethyl)phenyl)methanamine (**12a**)<sup>1</sup>

<sup>1</sup>H NMR (600 MHz, CHLOROFORM-D) δ 7.59 (d, *J* = 8.0 Hz, 2H), 7.44 (d, *J* = 8.0 Hz, 2H), 3.94 (s, 2H), 1.76 (s, 2H).

<sup>13</sup>C NMR (151 MHz, CHLOROFORM-D) δ 146.93 (s), 128.35 (q, *J* = 37.9 Hz), 127.36 (s), 125.48 (q, *J* = 2.6 Hz), 124.02 (q, *J* = 165.7 Hz), 45.96 (s).

GC-MS: *m/z*(%) 51(30), 77(30), 106(100), 127(65), 156(20), 174(90), HRMS Calcd. (ESI) *m/z* for C<sub>8</sub>H<sub>8</sub>F<sub>3</sub>N: [M+H]<sup>+</sup> 176.0682, found 176.0688

IR (KBr) cm<sup>-1</sup>: 810, 1440, 1610, 2870, 2950, 3000, 3300, 3391.

4-(aminomethyl)aniline (**13a**)<sup>2</sup>

<sup>1</sup>H NMR (600 MHz, CHLOROFORM-D) δ 7.41 (d, *J* = 8.6 Hz, 2H), 6.65 (d, *J* = 8.6 Hz, 2H), 4.17 (s, 2H), 3.81 (s, 2H), 1.62 (s, 1H).

<sup>13</sup>C NMR (151 MHz, CHLOROFORM-D) δ 151.22 (s), 133.81 (s), 120.74 (s), 114.51 (s), 99.10 (s).

GC-MS: *m/z*(%) 66(35), 78(10), 93(100), 122(95), HRMS Calcd. (ESI) *m/z* for C<sub>7</sub>H<sub>10</sub>N<sub>2</sub>: [M+2H]<sup>2+</sup> 124.0990, found 124.0985

IR (KBr) cm<sup>-1</sup>: 890, 1512, 1539, 2860, 2940, 3050, 3328, 3423.

3-(aminomethyl)aniline (**14a**)<sup>2</sup>

<sup>1</sup>H NMR (600 MHz, CHLOROFORM-D) δ 7.09 (t, *J* = 7.7 Hz, 1H), 6.73 – 6.67 (m, 2H), 6.57 (d, *J* = 7.9 Hz, 1H), 3.71 (s, 2H), 3.57 (s, 2H), 1.25 (s, 1H).

<sup>13</sup>C NMR (151 MHz, CHLOROFORM-D) δ 146.63 (s), 140.31 (s), 129.35 (s), 118.59 (s), 114.99 (s), 114.00 (s), 52.68 (s).

GC-MS: *m/z*(%) 66(35), 78(10), 93(100), 122(95), HRMS Calcd. (ESI) *m/z* for C<sub>7</sub>H<sub>10</sub>N<sub>2</sub>: [M+2H]<sup>2+</sup> 124.0990, found 124.0993

IR (KBr) cm<sup>-1</sup>: 900, 1510, 1540, 2870, 2940, 3050, 3340, 3450.

(4-(aminomethyl)phenyl)methanol (**15a**)

<sup>1</sup>H NMR (600 MHz, CHLOROFORM-D) δ 7.30 (s, 4H), 4.64 (s, 2H), 3.77 (s, 2H), 2.11 (s, 2H), 2.04 (s, 1H).

<sup>13</sup>C NMR (151 MHz, CHLOROFORM-D) δ 139.84 (s), 139.08 (s), 128.45 (s), 127.17 (s), 65.04 (s), 52.66 (s).

HRMS Calcd. (ESI) *m/z* for C<sub>8</sub>H<sub>11</sub>NO: [M+H]<sup>+</sup> 138.0913, found 138.0909.

IR (KBr) cm<sup>-1</sup>: 870, 1450, 1520, 2850, 2930, 3030, 3310, 3390, 3650.

Phenethylamine (**16a**)<sup>1</sup>

<sup>1</sup>H NMR (600 MHz, CHLOROFORM-D) δ 7.31 (d, *J* = 7.8 Hz, 2H), 7.26 (s, 2H), 7.20 (s, 1H), 3.52 (dd, *J* = 13.0, 6.8 Hz, 2H), 2.82 (d, *J* = 6.9 Hz, 2H), 2.28 (s, 2H).

<sup>13</sup>C NMR (151 MHz, CHLOROFORM-D) δ 138.87, 128.71 (d, *J* = 13.0 Hz), 126.54, 40.64, 35.63.

GC-MS: *m/z*(%) 65(70), 77(20), 91(100), 121(20), HRMS Calcd. (ESI) *m/z* for C<sub>8</sub>H<sub>11</sub>N: [M+H]<sup>+</sup> 122.0964, found 122.0966

IR (KBr) cm<sup>-1</sup>: 850, 1440, 1500, 2850, 2920, 3040, 3290, 3400.



# Copies of 1H and 13C NMR spectrums

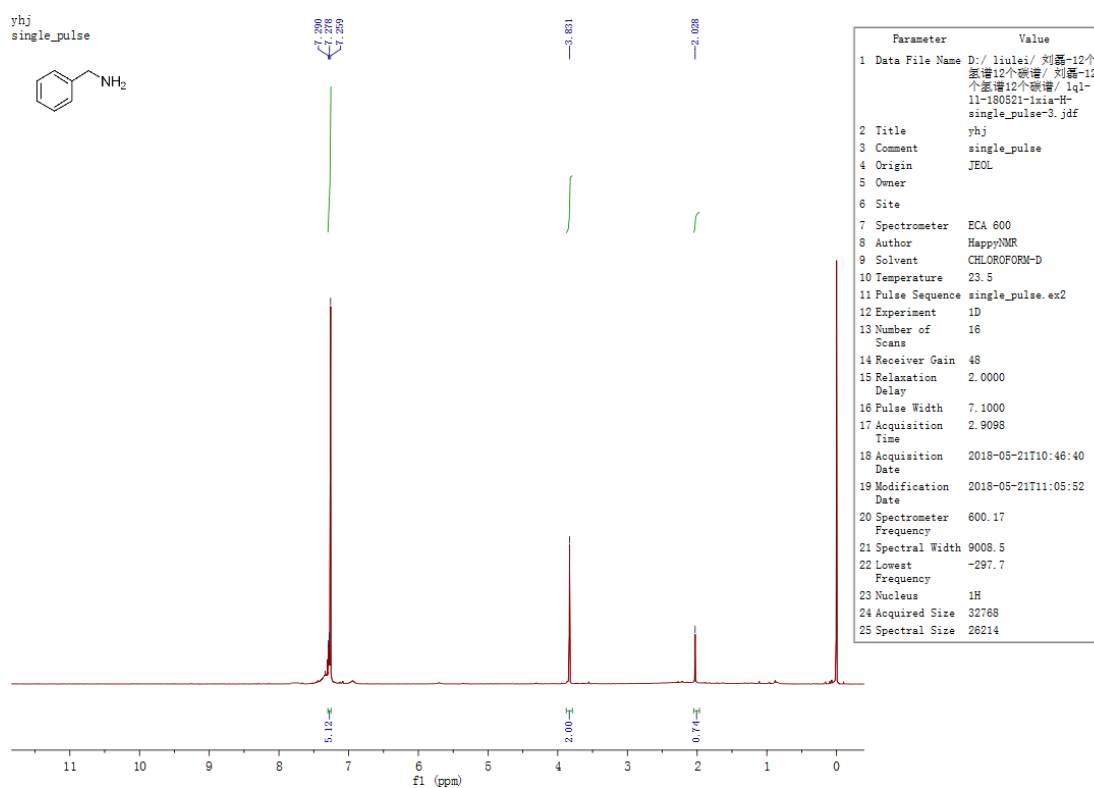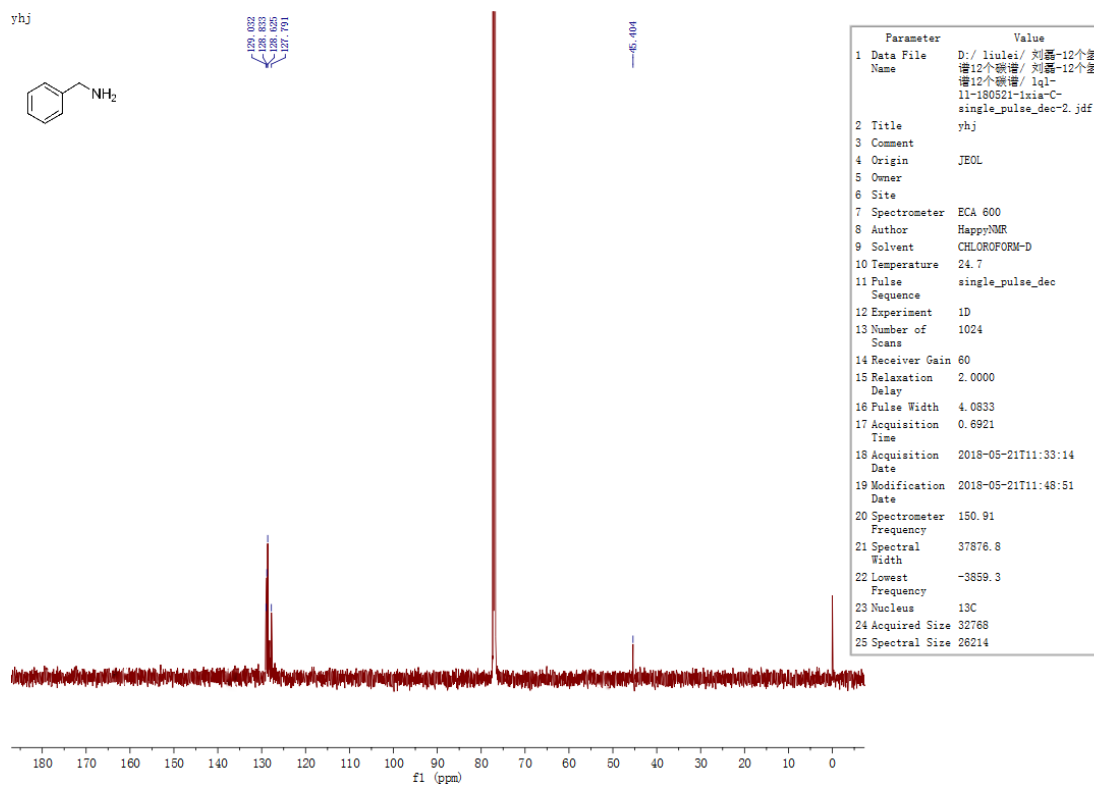

yhj  
single\_pulse

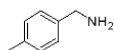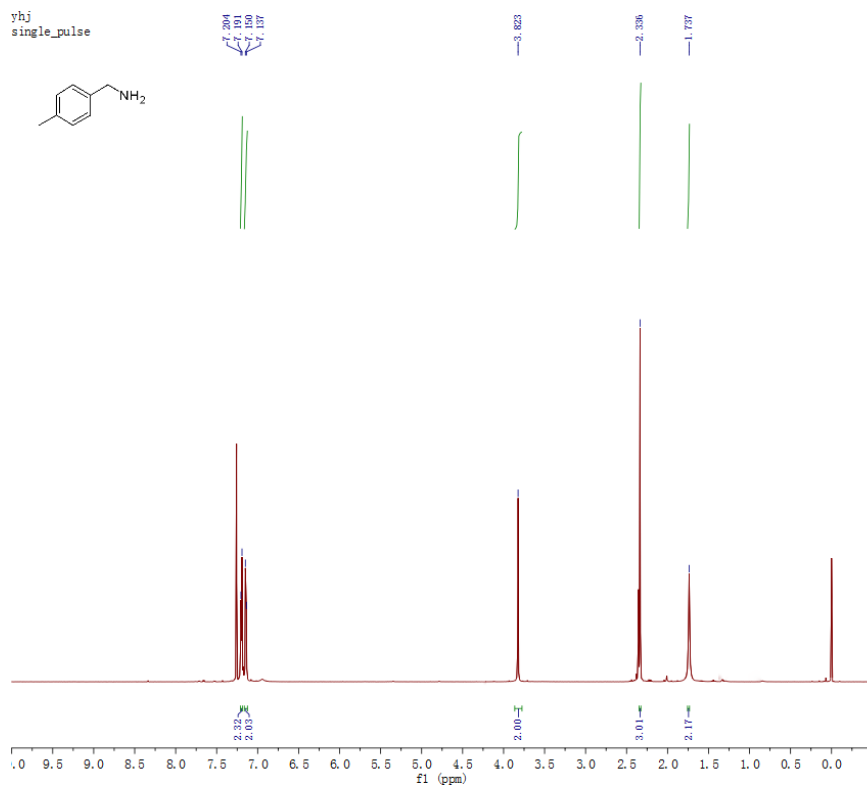

| Parameter                 | Value                                                               |
|---------------------------|---------------------------------------------------------------------|
| 1 Data File Name          | D:/l1ulei/Fw_thunmr-180423/lq1-ayj-180420-2xia-C-single_pulse-3.jdf |
| 2 Title                   | yhj                                                                 |
| 3 Comment                 | single_pulse                                                        |
| 4 Origin                  | JEOL                                                                |
| 5 Owner                   |                                                                     |
| 6 Site                    |                                                                     |
| 7 Spectrometer            | ECA 600                                                             |
| 8 Author                  | HappyNMR                                                            |
| 9 Solvent                 | CHLOROFORM-D                                                        |
| 10 Temperature            | 25.8                                                                |
| 11 Pulse Sequence         | single_pulse.ex 2                                                   |
| 12 Experiment             | 1D                                                                  |
| 13 Number of Scans        | 16                                                                  |
| 14 Receiver Gain          | 46                                                                  |
| 15 Relaxation Delay       | 2.0000                                                              |
| 16 Pulse Width            | 7.1000                                                              |
| 17 Acquisition Time       | 2.9098                                                              |
| 18 Acquisition Date       | 2018-04-20T16:18:39                                                 |
| 19 Modification Date      | 2018-04-20T16:35:40                                                 |
| 20 Spectrometer Frequency | 600.17                                                              |
| 21 Spectral Width         | 9008.5                                                              |
| 22 Lowest Frequency       | -298.3                                                              |
| 23 Nucleus                | 1H                                                                  |
| 24 Acquired Size          | 32768                                                               |
| 25 Spectral Size          | 26214                                                               |

yhj

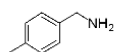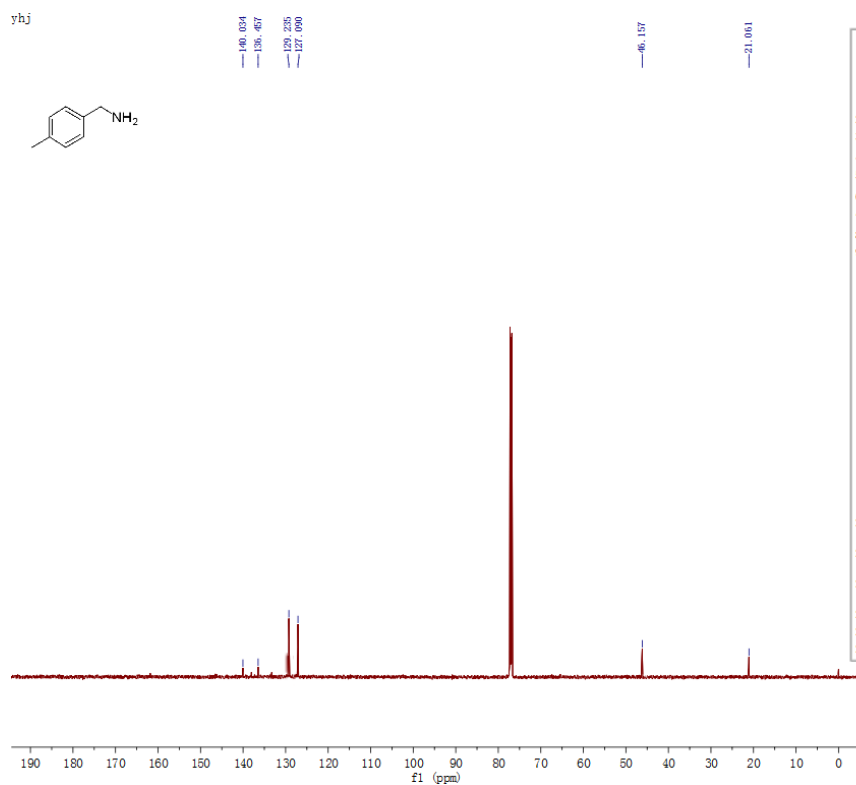

| Parameter                 | Value                                                                   |
|---------------------------|-------------------------------------------------------------------------|
| 1 Data File Name          | D:/l1ulei/Fw_thunmr-180423/lq1-ayj-180420-2xia-C-single_pulse_dec-3.jdf |
| 2 Title                   | yhj                                                                     |
| 3 Comment                 |                                                                         |
| 4 Origin                  | JEOL                                                                    |
| 5 Owner                   |                                                                         |
| 6 Site                    |                                                                         |
| 7 Spectrometer            | ECA 600                                                                 |
| 8 Author                  | HappyNMR                                                                |
| 9 Solvent                 | CHLOROFORM-D                                                            |
| 10 Temperature            | 24.5                                                                    |
| 11 Pulse Sequence         | single_pulse_dec                                                        |
| 12 Experiment             | 1D                                                                      |
| 13 Number of Scans        | 1024                                                                    |
| 14 Receiver Gain          | 58                                                                      |
| 15 Relaxation Delay       | 2.0000                                                                  |
| 16 Pulse Width            | 4.0833                                                                  |
| 17 Acquisition Time       | 0.6921                                                                  |
| 18 Acquisition Date       | 2018-04-23T06:58:52                                                     |
| 19 Modification Date      | 2018-04-23T09:15:31                                                     |
| 20 Spectrometer Frequency | 150.91                                                                  |
| 21 Spectral Width         | 37876.8                                                                 |
| 22 Lowest Frequency       | -3859.3                                                                 |
| 23 Nucleus                | 13C                                                                     |
| 24 Acquired Size          | 32768                                                                   |
| 25 Spectral Size          | 26214                                                                   |

yhj  
single\_pulse

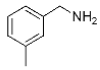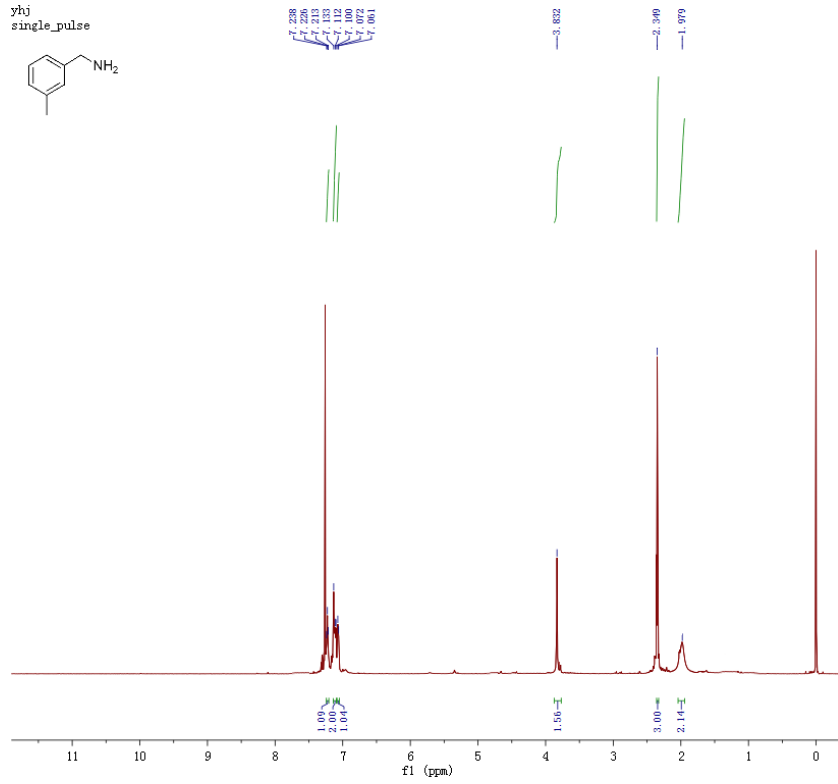

| Parameter                 | Value                                                                         |
|---------------------------|-------------------------------------------------------------------------------|
| 1 Data File Name          | D:/liulei/刘磊-12个氢谱12个氢谱/刘磊-12个氢谱12个氢谱/1q1-11-180521-3a1e-H-single_pulse-3.jdf |
| 2 Title                   | yhj                                                                           |
| 3 Comment                 | single_pulse                                                                  |
| 4 Origin                  | JEOL                                                                          |
| 5 Owner                   |                                                                               |
| 6 Site                    |                                                                               |
| 7 Spectrometer            | ECA 600                                                                       |
| 8 Author                  | HappyNMR                                                                      |
| 9 Solvent                 | CHLOROFORM-D                                                                  |
| 10 Temperature            | 23.4                                                                          |
| 11 Pulse Sequence         | single_pulse.ex2                                                              |
| 12 Experiment             | 1D                                                                            |
| 13 Number of Scans        | 16                                                                            |
| 14 Receiver Gain          | 44                                                                            |
| 15 Relaxation Delay       | 2.0000                                                                        |
| 16 Pulse Width            | 7.1000                                                                        |
| 17 Acquisition Time       | 2.9098                                                                        |
| 18 Acquisition Date       | 2018-05-21T12:02:53                                                           |
| 19 Modification Date      | 2018-05-21T12:19:04                                                           |
| 20 Spectrometer Frequency | 600.17                                                                        |
| 21 Spectral Width         | 9008.5                                                                        |
| 22 Lowest Frequency       | -298.3                                                                        |
| 23 Nucleus                | 1H                                                                            |
| 24 Acquired Size          | 32768                                                                         |
| 25 Spectral Size          | 26214                                                                         |

yhj

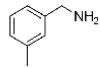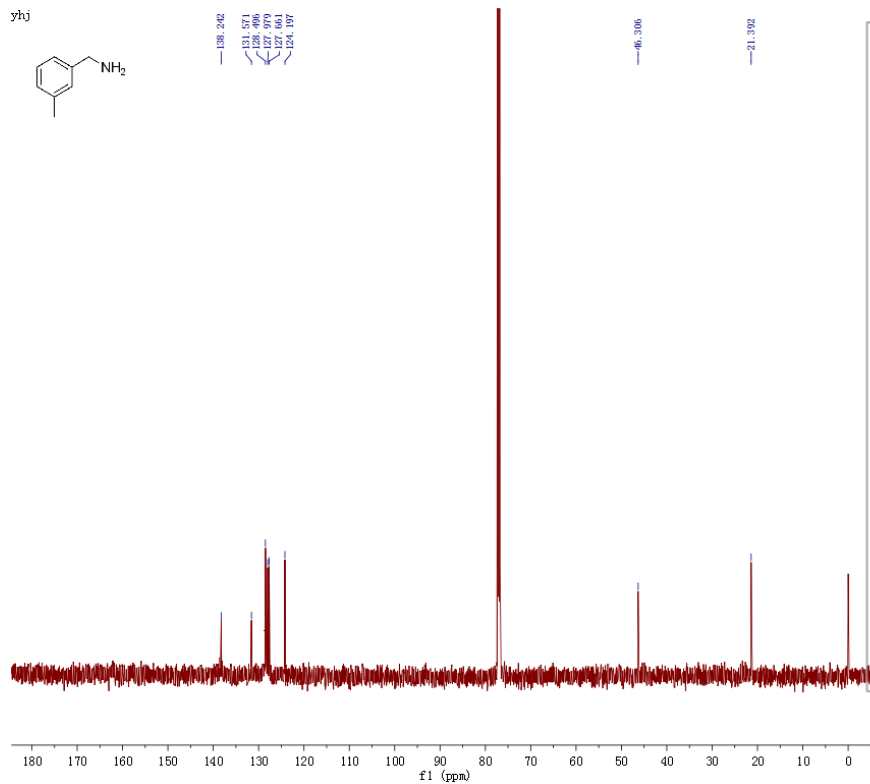

| Parameter                 | Value                                                                             |
|---------------------------|-----------------------------------------------------------------------------------|
| 1 Data File Name          | D:/liulei/刘磊-12个氢谱12个氢谱/刘磊-12个氢谱12个氢谱/1q1-11-180521-3a1e-C-single_pulse_dec-2.jdf |
| 2 Title                   | yhj                                                                               |
| 3 Comment                 |                                                                                   |
| 4 Origin                  | JEOL                                                                              |
| 5 Owner                   |                                                                                   |
| 6 Site                    |                                                                                   |
| 7 Spectrometer            | ECA 600                                                                           |
| 8 Author                  | HappyNMR                                                                          |
| 9 Solvent                 | CHLOROFORM-D                                                                      |
| 10 Temperature            | 24.7                                                                              |
| 11 Pulse Sequence         | single_pulse_dec                                                                  |
| 12 Experiment             | 1D                                                                                |
| 13 Number of Scans        | 1024                                                                              |
| 14 Receiver Gain          | 58                                                                                |
| 15 Relaxation Delay       | 2.0000                                                                            |
| 16 Pulse Width            | 4.0833                                                                            |
| 17 Acquisition Time       | 0.6921                                                                            |
| 18 Acquisition Date       | 2018-05-21T12:49:26                                                               |
| 19 Modification Date      | 2018-05-21T13:05:04                                                               |
| 20 Spectrometer Frequency | 150.91                                                                            |
| 21 Spectral Width         | 37876.8                                                                           |
| 22 Lowest Frequency       | -3859.4                                                                           |
| 23 Nucleus                | 13C                                                                               |
| 24 Acquired Size          | 32768                                                                             |
| 25 Spectral Size          | 26214                                                                             |

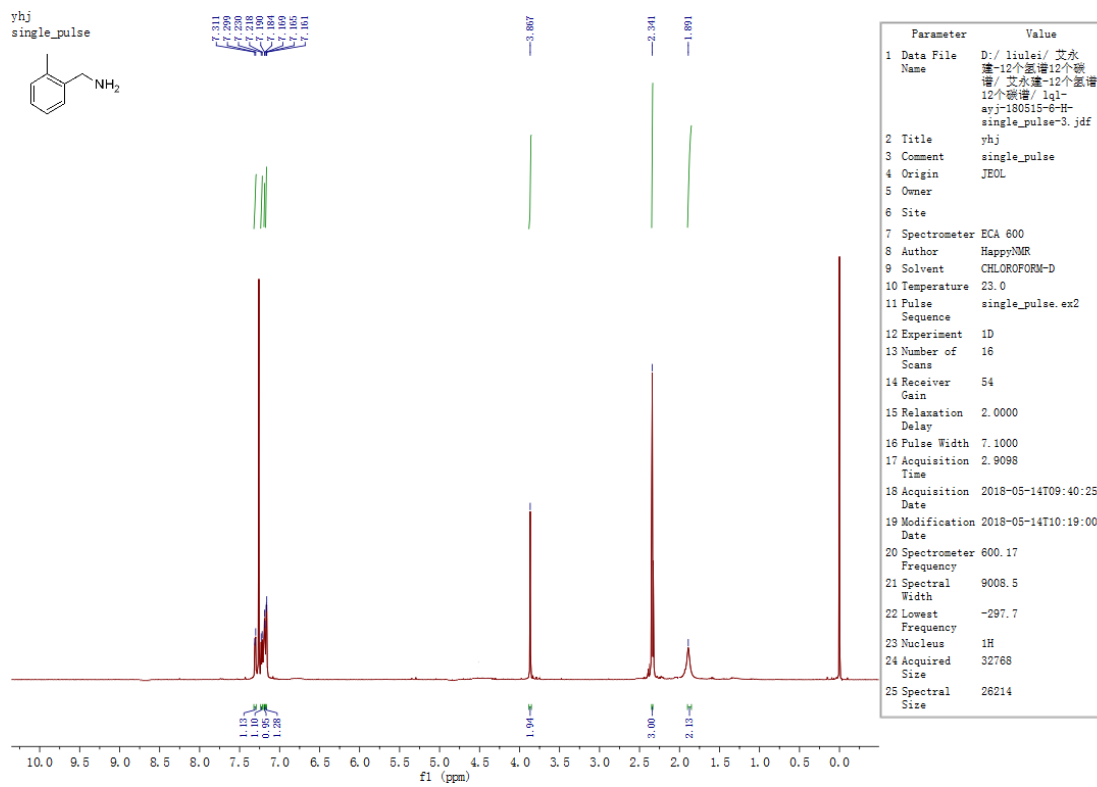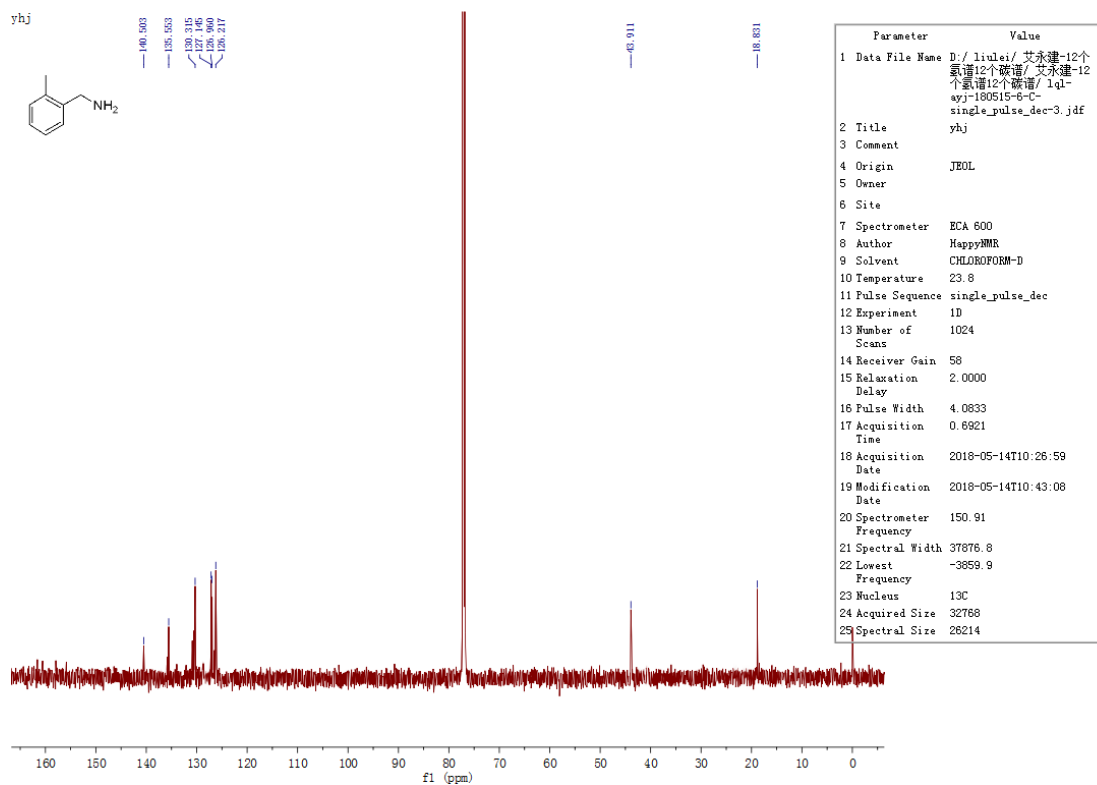

yhj  
single\_pulse

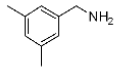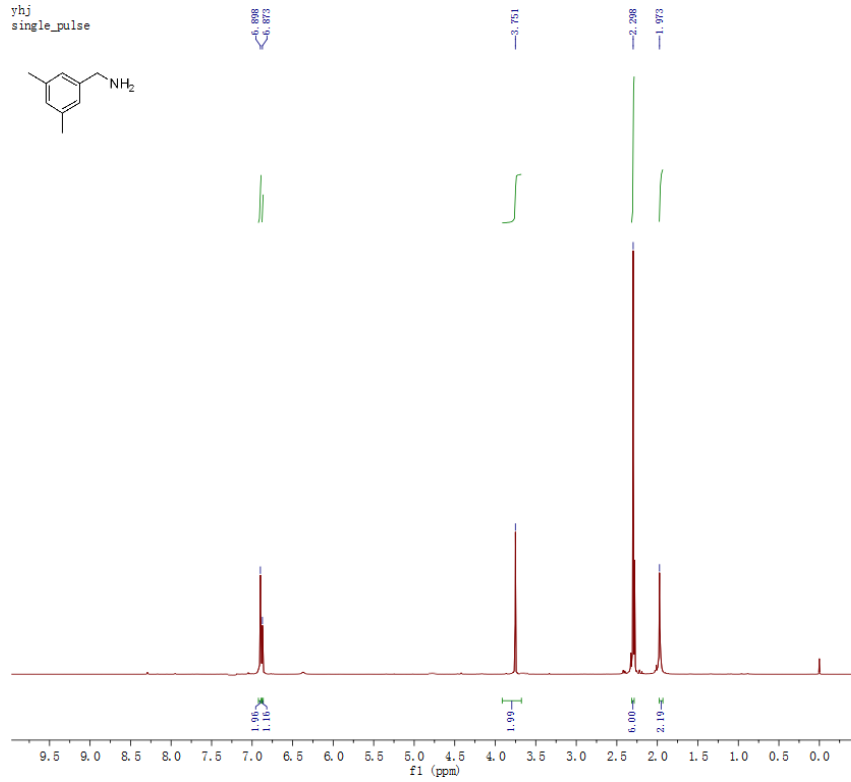

| Parameter                 | Value                                                                  |
|---------------------------|------------------------------------------------------------------------|
| 1 Data File Name          | D:/liulei/艾水建-12个碳谱/艾水建-12个碳谱/1q1-ayj-180515-8xia-H-single_pulse-3.jdf |
| 2 Title                   | yhj                                                                    |
| 3 Comment                 | single_pulse                                                           |
| 4 Origin                  | JEOL                                                                   |
| 5 Owner                   |                                                                        |
| 6 Site                    |                                                                        |
| 7 Spectrometer            | ECA 600                                                                |
| 8 Author                  | HappyNMR                                                               |
| 9 Solvent                 | CHLOROFORM-D                                                           |
| 10 Temperature            | 23.6                                                                   |
| 11 Pulse Sequence         | single_pulse.ex2                                                       |
| 12 Experiment             | 1D                                                                     |
| 13 Number of Scans        | 16                                                                     |
| 14 Receiver Gain          | 26                                                                     |
| 15 Relaxation Delay       | 2.0000                                                                 |
| 16 Pulse Width            | 7.1000                                                                 |
| 17 Acquisition Time       | 2.9098                                                                 |
| 18 Acquisition Date       | 2018-05-18T15:17:13                                                    |
| 19 Modification Date      | 2018-05-18T15:34:36                                                    |
| 20 Spectrometer Frequency | 600.17                                                                 |
| 21 Spectral Width         | 9008.5                                                                 |
| 22 Lowest Frequency       | -307.3                                                                 |
| 23 Nucleus                | 1H                                                                     |
| 24 Acquired Size          | 32768                                                                  |
| 25 Spectral Size          | 26214                                                                  |

yhj

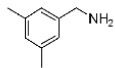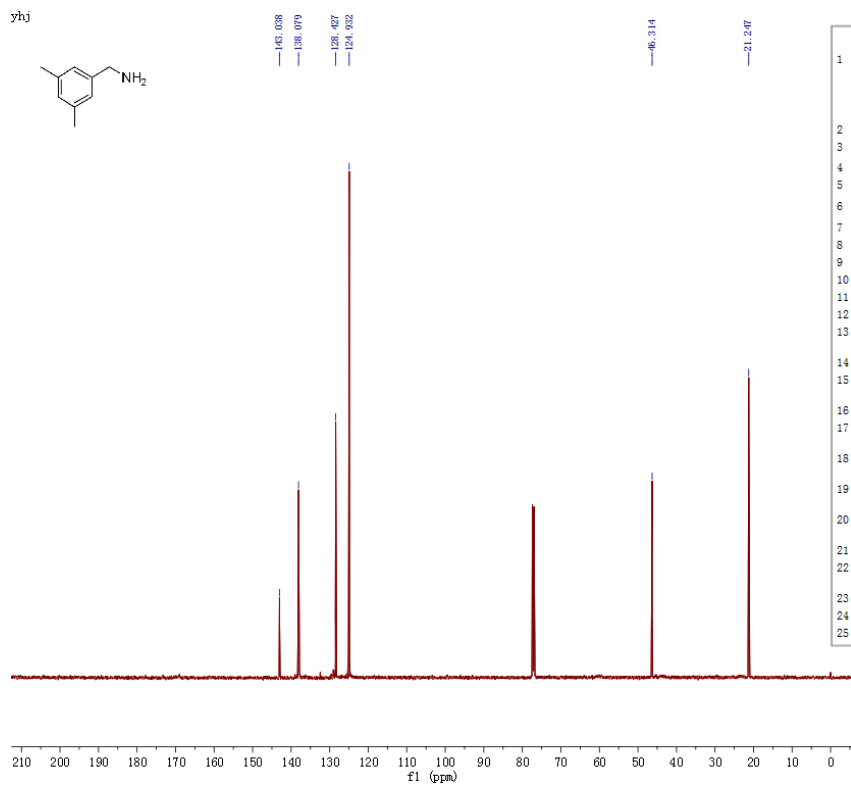

| Parameter                 | Value                                                                      |
|---------------------------|----------------------------------------------------------------------------|
| 1 Data File Name          | D:/liulei/艾水建-12个碳谱/艾水建-12个碳谱/1q1-ayj-180515-8xia-C-single_pulse_dec-3.jdf |
| 2 Title                   | yhj                                                                        |
| 3 Comment                 |                                                                            |
| 4 Origin                  | JEOL                                                                       |
| 5 Owner                   |                                                                            |
| 6 Site                    |                                                                            |
| 7 Spectrometer            | ECA 600                                                                    |
| 8 Author                  | HappyNMR                                                                   |
| 9 Solvent                 | CHLOROFORM-D                                                               |
| 10 Temperature            | 25.0                                                                       |
| 11 Pulse Sequence         | single_pulse_dec                                                           |
| 12 Experiment             | 1D                                                                         |
| 13 Number of Scans        | 247                                                                        |
| 14 Receiver Gain          | 58                                                                         |
| 15 Relaxation Delay       | 2.0000                                                                     |
| 16 Pulse Width            | 4.0833                                                                     |
| 17 Acquisition Time       | 0.6921                                                                     |
| 18 Acquisition Date       | 2018-05-18T15:30:25                                                        |
| 19 Modification Date      | 2018-05-18T15:47:15                                                        |
| 20 Spectrometer Frequency | 150.91                                                                     |
| 21 Spectral Width         | 37876.8                                                                    |
| 22 Lowest Frequency       | -3861.5                                                                    |
| 23 Nucleus                | 13C                                                                        |
| 24 Acquired Size          | 32768                                                                      |
| 25 Spectral Size          | 26214                                                                      |

yhj  
single\_pulse

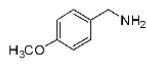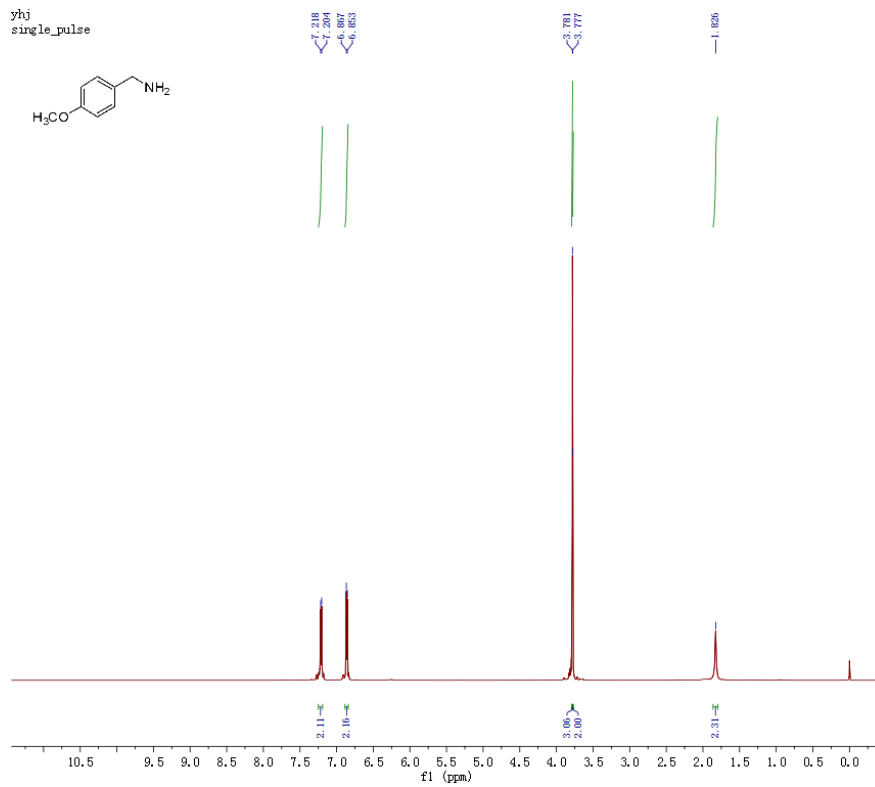

| Parameter                 | Value                                                                                                    |
|---------------------------|----------------------------------------------------------------------------------------------------------|
| 1 Data File Name          | D:/ liulei/ 艾永<br>建-12个氮谱12个碳谱/<br>艾永建-12个氮谱<br>12个碳谱/ 1q1-<br>ayj-180515-12xia-H-<br>single_pulse-2.jdf |
| 2 Title                   | yhj                                                                                                      |
| 3 Comment                 | single_pulse                                                                                             |
| 4 Origin                  | JEOL                                                                                                     |
| 5 Owner                   |                                                                                                          |
| 6 Site                    |                                                                                                          |
| 7 Spectrometer            | ECA 600                                                                                                  |
| 8 Author                  | HappyNMR                                                                                                 |
| 9 Solvent                 | CHLOROFORM-D                                                                                             |
| 10 Temperature            | 24.0                                                                                                     |
| 11 Pulse Sequence         | single_pulse.ex2                                                                                         |
| 12 Experiment             | 1D                                                                                                       |
| 13 Number of Scans        | 16                                                                                                       |
| 14 Receiver Gain          | 30                                                                                                       |
| 15 Relaxation Delay       | 2.0000                                                                                                   |
| 16 Pulse Width            | 7.1000                                                                                                   |
| 17 Acquisition Time       | 2.9098                                                                                                   |
| 18 Acquisition Date       | 2018-05-18T15:42:38                                                                                      |
| 19 Modification Date      | 2018-05-18T15:58:17                                                                                      |
| 20 Spectrometer Frequency | 600.17                                                                                                   |
| 21 Spectral Width         | 9008.5                                                                                                   |
| 22 Lowest Frequency       | -291.1                                                                                                   |
| 23 Nucleus                | 1H                                                                                                       |
| 24 Acquired Size          | 32768                                                                                                    |
| 25 Spectral Size          | 26214                                                                                                    |

yhj

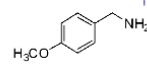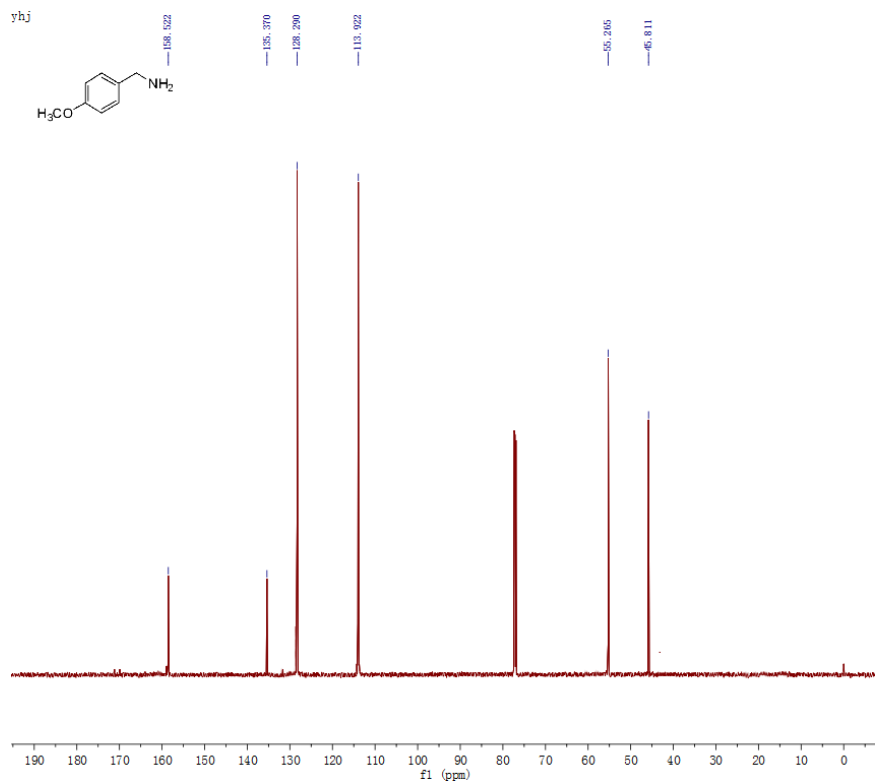

| Parameter                 | Value                                                                                                                                        |
|---------------------------|----------------------------------------------------------------------------------------------------------------------------------------------|
| 1 Data File Name          | D:/ liulei/ 艾永<br>建-12个氮谱12个碳谱/<br>艾永建-12个氮谱-12个<br>碳谱/ 艾永建-12个<br>氮谱12个碳谱/<br>1q1-<br>ayj-180515-12xia<br>-C-<br>single_pulse_dec<br>-3.jdf |
| 2 Title                   | yhj                                                                                                                                          |
| 3 Comment                 |                                                                                                                                              |
| 4 Origin                  | JEOL                                                                                                                                         |
| 5 Owner                   |                                                                                                                                              |
| 6 Site                    |                                                                                                                                              |
| 7 Spectrometer            | ECA 600                                                                                                                                      |
| 8 Author                  | HappyNMR                                                                                                                                     |
| 9 Solvent                 | CHLOROFORM-D                                                                                                                                 |
| 10 Temperature            | 25.0                                                                                                                                         |
| 11 Pulse Sequence         | single_pulse_dec                                                                                                                             |
| 12 Experiment             | 1D                                                                                                                                           |
| 13 Number of Scans        | 316                                                                                                                                          |
| 14 Receiver Gain          | 58                                                                                                                                           |
| 15 Relaxation Delay       | 2.0000                                                                                                                                       |
| 16 Pulse Width            | 4.0833                                                                                                                                       |
| 17 Acquisition Time       | 0.6921                                                                                                                                       |
| 18 Acquisition Date       | 2018-05-18T15:57:27                                                                                                                          |
| 19 Modification Date      | 2018-05-18T16:14:06                                                                                                                          |
| 20 Spectrometer Frequency | 150.91                                                                                                                                       |
| 21 Spectral Width         | 37876.8                                                                                                                                      |
| 22 Lowest Frequency       | -3859.4                                                                                                                                      |
| 23 Nucleus                | 13C                                                                                                                                          |
| 24 Acquired Size          | 32768                                                                                                                                        |
| 25 Spectral Size          | 26214                                                                                                                                        |

yhj  
single\_pulse

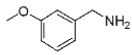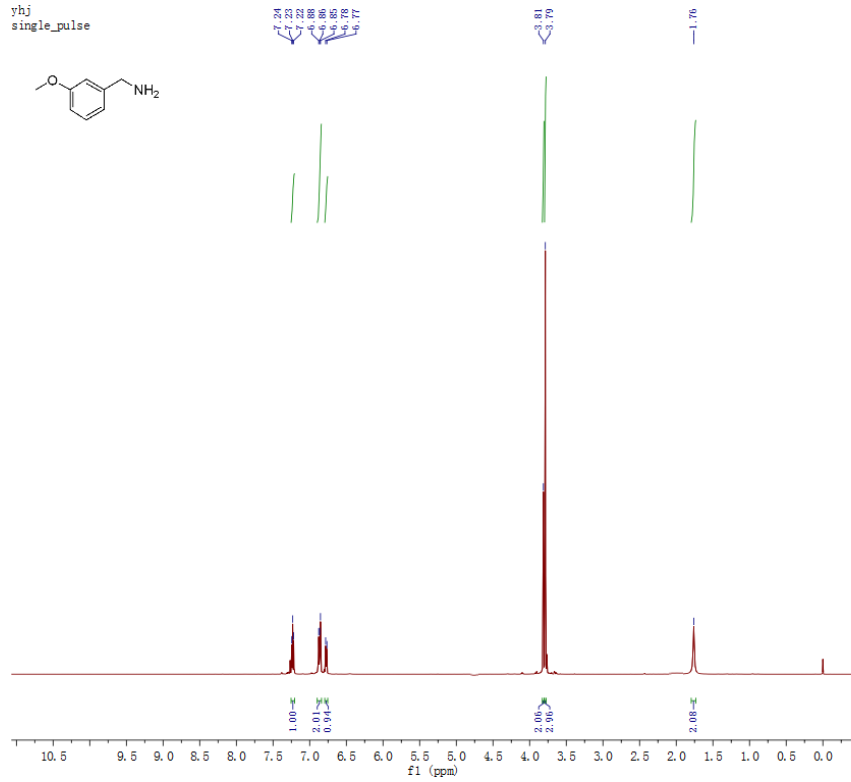

| Parameter                 | Value                                                                                 |
|---------------------------|---------------------------------------------------------------------------------------|
| 1 Data File Name          | D:/ liulei/ 艾永建-12个基峰12个峰谱/ 艾永建-12个基峰12个峰谱/ 1q1-ayj-180515-13sia-H-single_pulse-2.jdf |
| 2 Title                   | yhj                                                                                   |
| 3 Comment                 | single_pulse                                                                          |
| 4 Origin                  | JEOL                                                                                  |
| 5 Owner                   |                                                                                       |
| 6 Site                    |                                                                                       |
| 7 Spectrometer            | ECA 600                                                                               |
| 8 Author                  | HappyNMR                                                                              |
| 9 Solvent                 | CHLOROFORM-D                                                                          |
| 10 Temperature            | 24.0                                                                                  |
| 11 Pulse Sequence         | single_pulse.es2                                                                      |
| 12 Experiment             | 1D                                                                                    |
| 13 Number of Scans        | 16                                                                                    |
| 14 Receiver Gain          | 28                                                                                    |
| 15 Relaxation Delay       | 2.0000                                                                                |
| 16 Pulse Width            | 7.1000                                                                                |
| 17 Acquisition Time       | 2.9098                                                                                |
| 18 Acquisition Date       | 2018-05-18T16:34:51                                                                   |
| 19 Modification Date      | 2018-05-18T16:50:30                                                                   |
| 20 Spectrometer Frequency | 600.17                                                                                |
| 21 Spectral Width         | 9008.5                                                                                |
| 22 Lowest Frequency       | -293.5                                                                                |
| 23 Nucleus                | 1H                                                                                    |
| 24 Acquired Size          | 32768                                                                                 |
| 25 Spectral Size          | 26214                                                                                 |

yhj

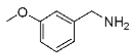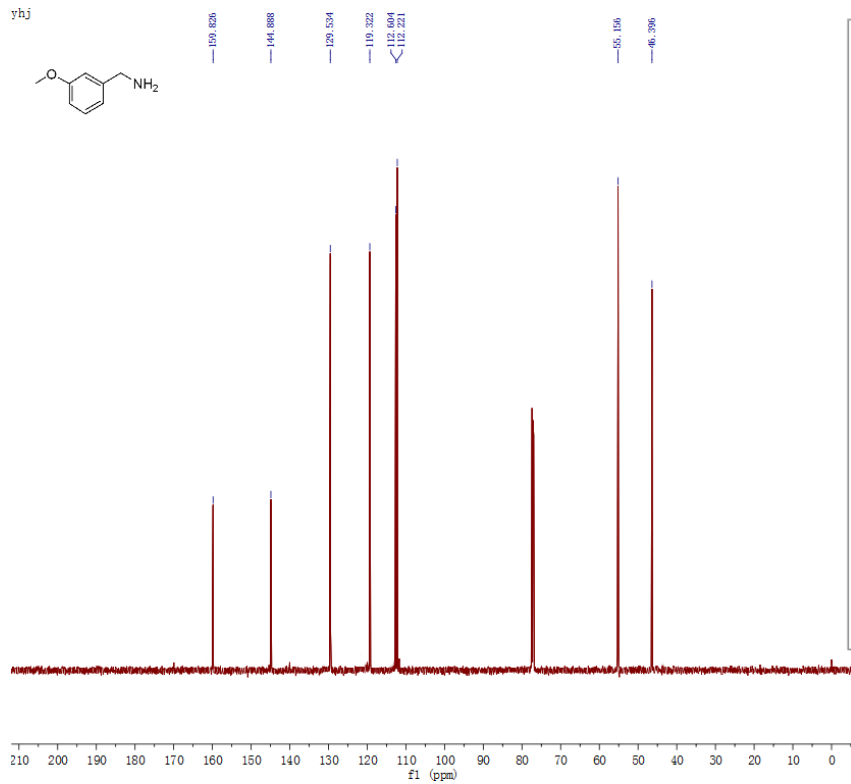

| Parameter                 | Value                                                                                     |
|---------------------------|-------------------------------------------------------------------------------------------|
| 1 Data File Name          | D:/ liulei/ 艾永建-12个基峰12个峰谱/ 艾永建-12个基峰12个峰谱/ 1q1-ayj-180515-13sia-C-single_pulse_dec-3.jdf |
| 2 Title                   | yhj                                                                                       |
| 3 Comment                 |                                                                                           |
| 4 Origin                  | JEOL                                                                                      |
| 5 Owner                   |                                                                                           |
| 6 Site                    |                                                                                           |
| 7 Spectrometer            | ECA 600                                                                                   |
| 8 Author                  | HappyNMR                                                                                  |
| 9 Solvent                 | CHLOROFORM-D                                                                              |
| 10 Temperature            | 25.0                                                                                      |
| 11 Pulse Sequence         | single_pulse_dec                                                                          |
| 12 Experiment             | 1D                                                                                        |
| 13 Number of Scans        | 112                                                                                       |
| 14 Receiver Gain          | 58                                                                                        |
| 15 Relaxation Delay       | 2.0000                                                                                    |
| 16 Pulse Width            | 4.0833                                                                                    |
| 17 Acquisition Time       | 0.6921                                                                                    |
| 18 Acquisition Date       | 2018-05-18T16:40:30                                                                       |
| 19 Modification Date      | 2018-05-18T16:57:06                                                                       |
| 20 Spectrometer Frequency | 150.91                                                                                    |
| 21 Spectral Width         | 37876.8                                                                                   |
| 22 Lowest Frequency       | -3860.9                                                                                   |
| 23 Nucleus                | 13C                                                                                       |
| 24 Acquired Size          | 32768                                                                                     |
| 25 Spectral Size          | 26214                                                                                     |

yhj  
single\_pulse

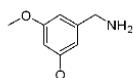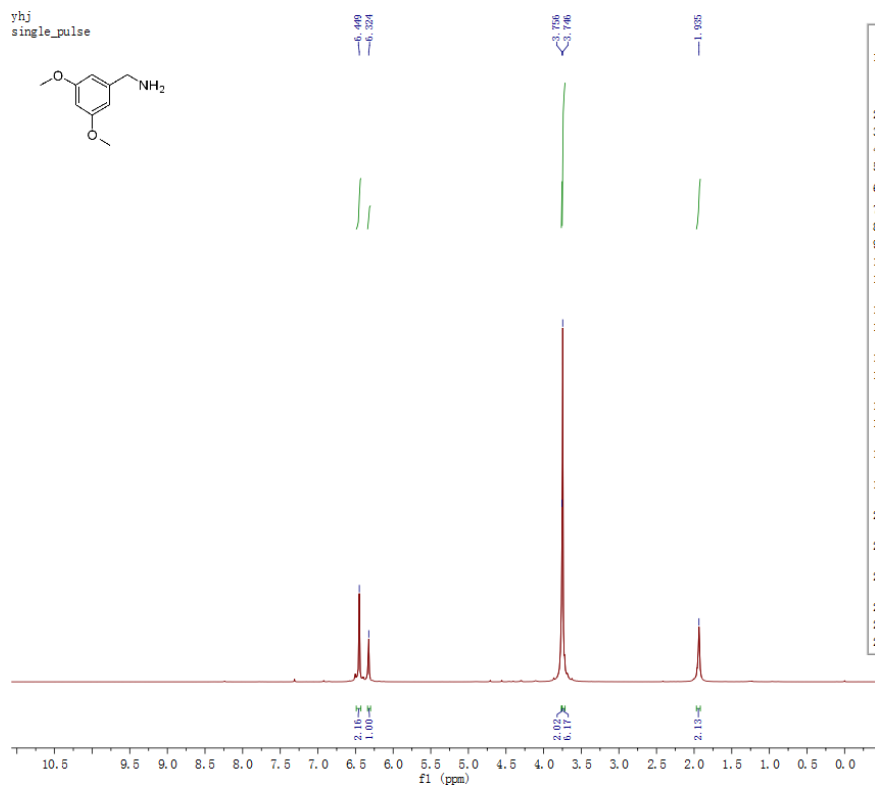

| Parameter                 | Value                                                              |
|---------------------------|--------------------------------------------------------------------|
| 1 Data File Name          | D:/liulei/Fw_thunmr-180423/1q1-ayj-180423-5xia-Hsingle_pulse-2.jdf |
| 2 Title                   | yhj                                                                |
| 3 Comment                 | single_pulse                                                       |
| 4 Origin                  | JEOL                                                               |
| 5 Owner                   |                                                                    |
| 6 Site                    |                                                                    |
| 7 Spectrometer            | ECA 600                                                            |
| 8 Author                  | HappyNMR                                                           |
| 9 Solvent                 | CHLOROFORM-D                                                       |
| 10 Temperature            | 24.2                                                               |
| 11 Pulse Sequence         | single_pulse.ex2                                                   |
| 12 Experiment             | 1D                                                                 |
| 13 Number of Scans        | 16                                                                 |
| 14 Receiver Gain          | 22                                                                 |
| 15 Relaxation Delay       | 2.0000                                                             |
| 16 Pulse Width            | 7.1000                                                             |
| 17 Acquisition Time       | 2.9098                                                             |
| 18 Acquisition Date       | 2018-04-23T15:54:24                                                |
| 19 Modification Date      | 2018-04-23T16:10:06                                                |
| 20 Spectrometer Frequency | 600.17                                                             |
| 21 Spectral Width         | 9008.5                                                             |
| 22 Lowest Frequency       | -266.4                                                             |
| 23 Nucleus                | 1H                                                                 |
| 24 Acquired Size          | 32768                                                              |
| 25 Spectral Size          | 26214                                                              |

yhj

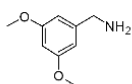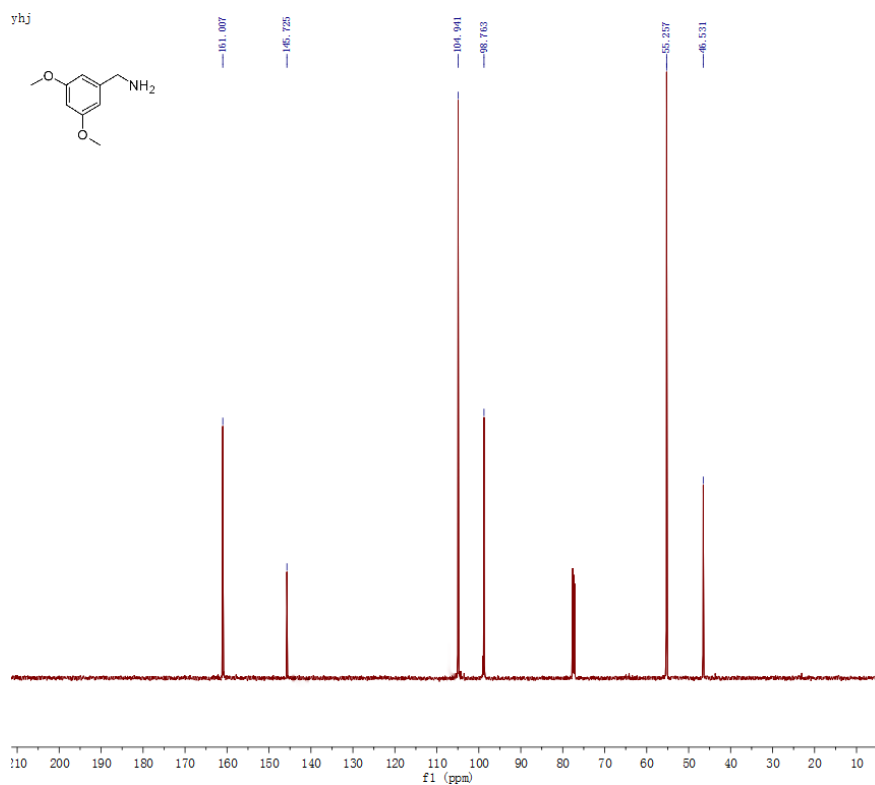

| Parameter                 | Value                                                                      |
|---------------------------|----------------------------------------------------------------------------|
| 1 Data File Name          | D:/liulei/Fw_thunmr-180423/3/1q1-ayj-180423-5xia-C-single_pulse_de-c-4.jdf |
| 2 Title                   | yhj                                                                        |
| 3 Comment                 |                                                                            |
| 4 Origin                  | JEOL                                                                       |
| 5 Owner                   |                                                                            |
| 6 Site                    |                                                                            |
| 7 Spectrometer            | ECA 600                                                                    |
| 8 Author                  | HappyNMR                                                                   |
| 9 Solvent                 | CHLOROFORM-D                                                               |
| 10 Temperature            | 25.2                                                                       |
| 11 Pulse Sequence         | single_pulse_de c                                                          |
| 12 Experiment             | 1D                                                                         |
| 13 Number of Scans        | 84                                                                         |
| 14 Receiver Gain          | 58                                                                         |
| 15 Relaxation Delay       | 2.0000                                                                     |
| 16 Pulse Width            | 4.0833                                                                     |
| 17 Acquisition Time       | 0.6921                                                                     |
| 18 Acquisition Date       | 2018-04-23T15:58:53                                                        |
| 19 Modification Date      | 2018-04-23T16:17:57                                                        |
| 20 Spectrometer Frequency | 150.91                                                                     |
| 21 Spectral Width         | 37876.8                                                                    |
| 22 Lowest Frequency       | -3847.0                                                                    |
| 23 Nucleus                | 13C                                                                        |
| 24 Acquired Size          | 32768                                                                      |
| 25 Spectral Size          | 26214                                                                      |



yhj  
single\_pulse

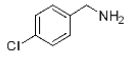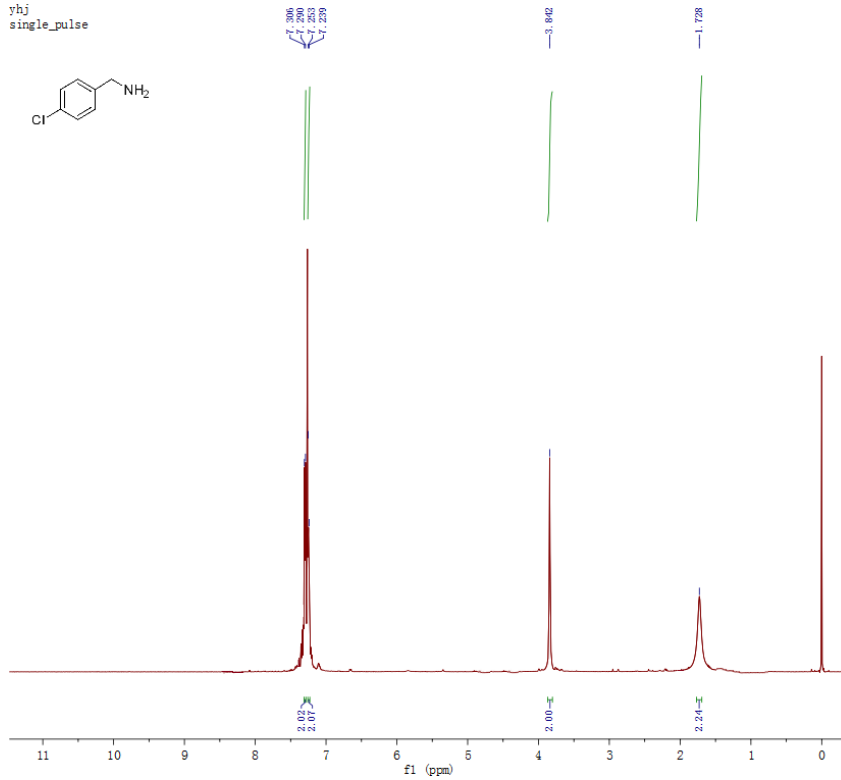

| Parameter                 | Value                                                                      |
|---------------------------|----------------------------------------------------------------------------|
| 1 Data File Name          | D:/ liulei/ 氨基还原核磁/ Fw_thunmr-180626/ lq1-11-180625-4-H-single_pulse-3.jdf |
| 2 Title                   | yhj                                                                        |
| 3 Comment                 | single_pulse                                                               |
| 4 Origin                  | JEOL                                                                       |
| 5 Owner                   |                                                                            |
| 6 Site                    |                                                                            |
| 7 Spectrometer            | ECA 600                                                                    |
| 8 Author                  | HappyNMR                                                                   |
| 9 Solvent                 | CHLOROFORM-D                                                               |
| 10 Temperature            | 25.1                                                                       |
| 11 Pulse Sequence         | single_pulse.ex2                                                           |
| 12 Experiment             | 1D                                                                         |
| 13 Number of Scans        | 16                                                                         |
| 14 Receiver Gain          | 48                                                                         |
| 15 Relaxation Delay       | 2.0000                                                                     |
| 16 Pulse Width            | 7.1000                                                                     |
| 17 Acquisition Time       | 2.9098                                                                     |
| 18 Acquisition Date       | 2018-06-25T15:07:40                                                        |
| 19 Modification Date      | 2018-06-25T15:27:25                                                        |
| 20 Spectrometer Frequency | 600.17                                                                     |
| 21 Spectral Width         | 9008.5                                                                     |
| 22 Lowest Frequency       | -295.3                                                                     |
| 23 Nucleus                | 1H                                                                         |
| 24 Acquired Size          | 32768                                                                      |
| 25 Spectral Size          | 26214                                                                      |

yhj

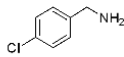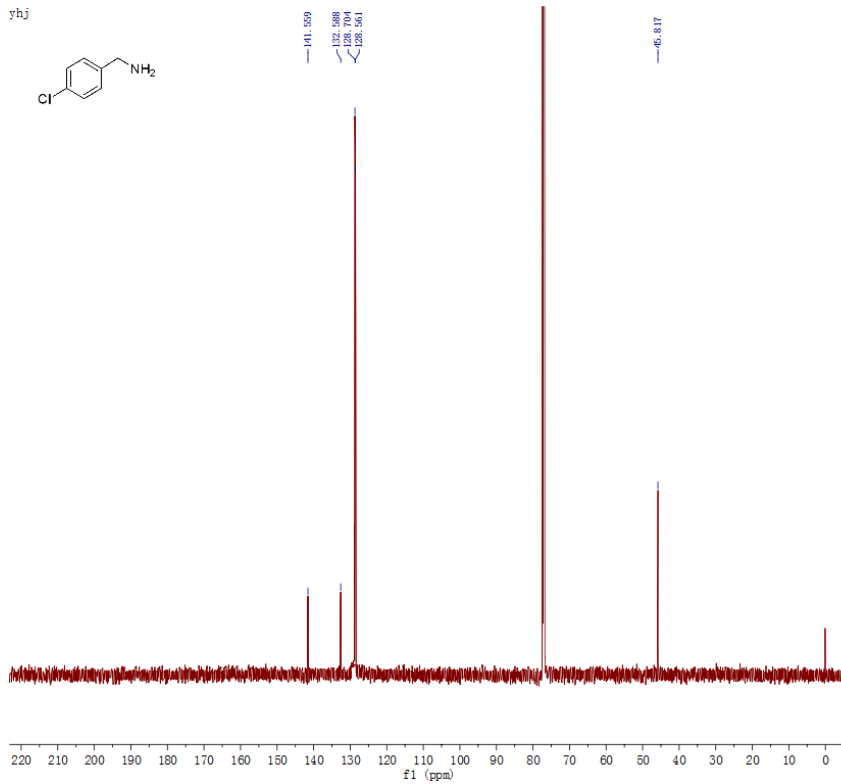

| Parameter                 | Value                                                                          |
|---------------------------|--------------------------------------------------------------------------------|
| 1 Data File Name          | D:/ liulei/ 氨基还原核磁/ Fw_thunmr-180626/ lq1-11-180625-4-C-single_pulse_dec-3.jdf |
| 2 Title                   | yhj                                                                            |
| 3 Comment                 |                                                                                |
| 4 Origin                  | JEOL                                                                           |
| 5 Owner                   |                                                                                |
| 6 Site                    |                                                                                |
| 7 Spectrometer            | ECA 600                                                                        |
| 8 Author                  | HappyNMR                                                                       |
| 9 Solvent                 | CHLOROFORM-D                                                                   |
| 10 Temperature            | 26.1                                                                           |
| 11 Pulse Sequence         | single_pulse_dec                                                               |
| 12 Experiment             | 1D                                                                             |
| 13 Number of Scans        | 1024                                                                           |
| 14 Receiver Gain          | 58                                                                             |
| 15 Relaxation Delay       | 2.0000                                                                         |
| 16 Pulse Width            | 4.0833                                                                         |
| 17 Acquisition Time       | 0.6921                                                                         |
| 18 Acquisition Date       | 2018-06-26T08:51:24                                                            |
| 19 Modification Date      | 2018-06-26T09:18:33                                                            |
| 20 Spectrometer Frequency | 150.91                                                                         |
| 21 Spectral Width         | 37876.8                                                                        |
| 22 Lowest Frequency       | -3847.0                                                                        |
| 23 Nucleus                | 13C                                                                            |
| 24 Acquired Size          | 32768                                                                          |
| 25 Spectral Size          | 26214                                                                          |

yhj  
single\_pulse

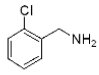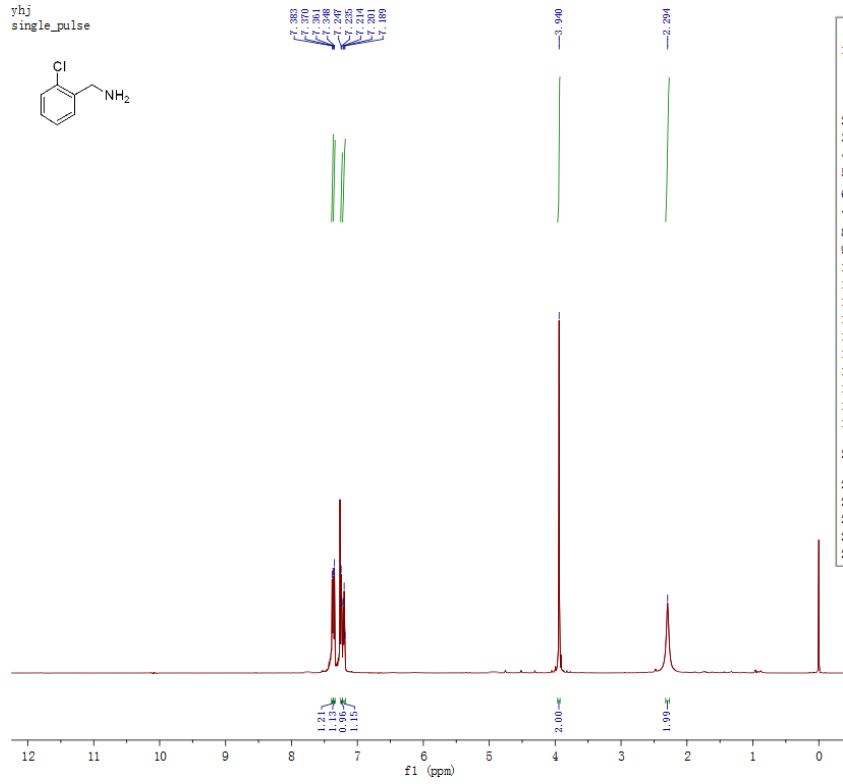

| Parameter                 | Value                                                                       |
|---------------------------|-----------------------------------------------------------------------------|
| 1 Data File Name          | D:/ liulei/ 艾水達-12个碳谱/ 艾水達-12个碳谱/ lql-ayj-180515-11xiaH-single_pulse-3. jdf |
| 2 Title                   | yhj                                                                         |
| 3 Comment                 | single_pulse                                                                |
| 4 Origin                  | JEOL                                                                        |
| 5 Owner                   |                                                                             |
| 6 Site                    |                                                                             |
| 7 Spectrometer            | ECA 600                                                                     |
| 8 Author                  | HappyNMR                                                                    |
| 9 Solvent                 | CHLOROFORM-D                                                                |
| 10 Temperature            | 24.1                                                                        |
| 11 Pulse Sequence         | single_pulse.es2                                                            |
| 12 Experiment             | 1D                                                                          |
| 13 Number of Scans        | 16                                                                          |
| 14 Receiver Gain          | 42                                                                          |
| 15 Relaxation Delay       | 2.0000                                                                      |
| 16 Pulse Width            | 7.1000                                                                      |
| 17 Acquisition Time       | 2.9098                                                                      |
| 18 Acquisition Date       | 2018-05-18T12:14:11                                                         |
| 19 Modification Date      | 2018-05-18T12:30:42                                                         |
| 20 Spectrometer Frequency | 600.17                                                                      |
| 21 Spectral Width         | 9008.5                                                                      |
| 22 Lowest Frequency       | -294.7                                                                      |
| 23 Nucleus                | 1H                                                                          |
| 24 Acquired Size          | 32768                                                                       |
| 25 Spectral Size          | 26214                                                                       |

yhj

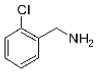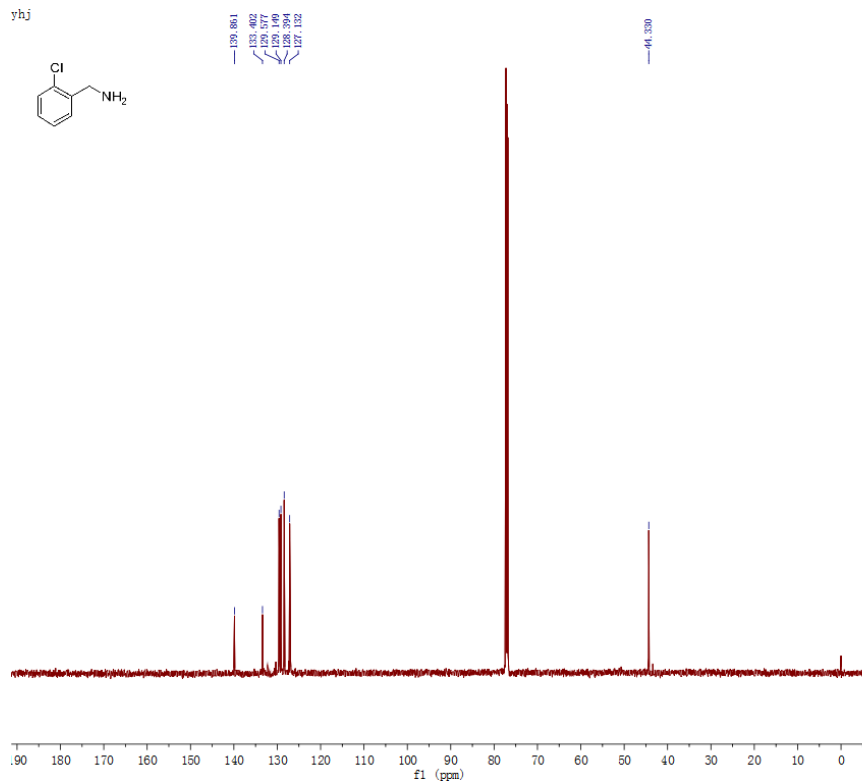

| Parameter                 | Value                                                                           |
|---------------------------|---------------------------------------------------------------------------------|
| 1 Data File Name          | D:/ liulei/ 艾水達-12个碳谱/ 艾水達-12个碳谱/ lql-ayj-180515-11xiaH-single_pulse_dec-3. jdf |
| 2 Title                   | yhj                                                                             |
| 3 Comment                 |                                                                                 |
| 4 Origin                  | JEOL                                                                            |
| 5 Owner                   |                                                                                 |
| 6 Site                    |                                                                                 |
| 7 Spectrometer            | ECA 600                                                                         |
| 8 Author                  | HappyNMR                                                                        |
| 9 Solvent                 | CHLOROFORM-D                                                                    |
| 10 Temperature            | 25.1                                                                            |
| 11 Pulse Sequence         | single_pulse_dec                                                                |
| 12 Experiment             | 1D                                                                              |
| 13 Number of Scans        | 728                                                                             |
| 14 Receiver Gain          | 58                                                                              |
| 15 Relaxation Delay       | 2.0000                                                                          |
| 16 Pulse Width            | 4.0833                                                                          |
| 17 Acquisition Time       | 0.6921                                                                          |
| 18 Acquisition Date       | 2018-05-18T12:47:28                                                             |
| 19 Modification Date      | 2018-05-18T13:03:20                                                             |
| 20 Spectrometer Frequency | 150.91                                                                          |
| 21 Spectral Width         | 37876.8                                                                         |
| 22 Lowest Frequency       | -3859.3                                                                         |
| 23 Nucleus                | 13C                                                                             |
| 24 Acquired Size          | 32768                                                                           |
| 25 Spectral Size          | 26214                                                                           |

yhj  
single\_pulse

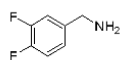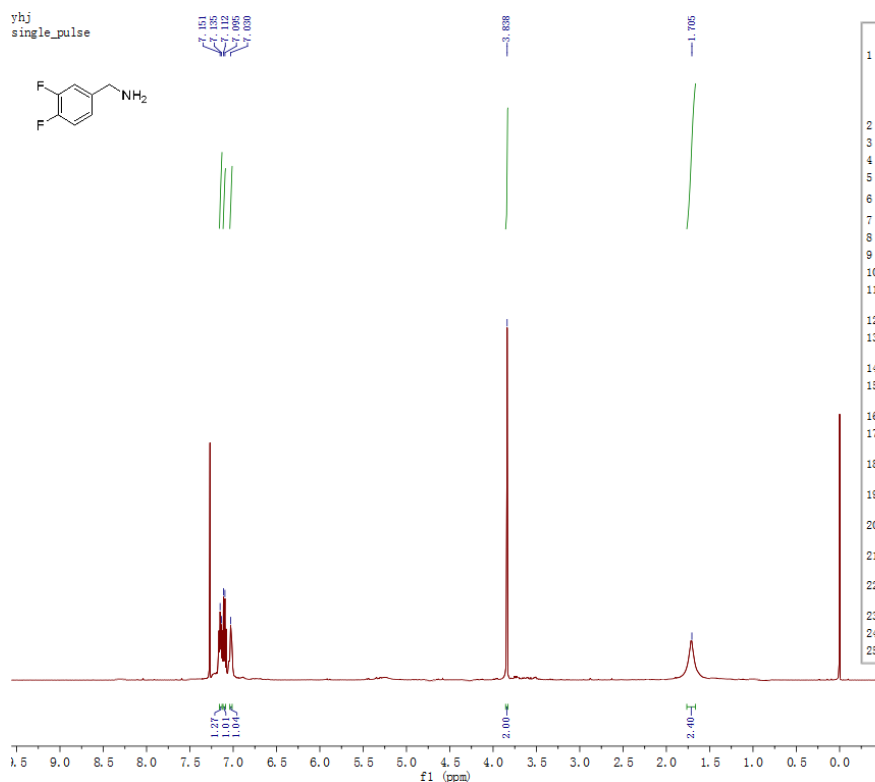

| Parameter                 | Value                                                                          |
|---------------------------|--------------------------------------------------------------------------------|
| 1 Data File Name          | D:/liulei/刘磊-12个基谱12个碳谱/刘磊-12个基谱12个碳谱/1q1-11-180521-17xia-H-single_pulse-3.jdf |
| 2 Title                   | yhj                                                                            |
| 3 Comment                 | single_pulse                                                                   |
| 4 Origin                  | JEOL                                                                           |
| 5 Owner                   |                                                                                |
| 6 Site                    |                                                                                |
| 7 Spectrometer            | ECA 600                                                                        |
| 8 Author                  | HappyNMR                                                                       |
| 9 Solvent                 | CHLOROFORM-D                                                                   |
| 10 Temperature            | 23.7                                                                           |
| 11 Pulse Sequence         | single_pulse.ex2                                                               |
| 12 Experiment             | 1D                                                                             |
| 13 Number of Scans        | 16                                                                             |
| 14 Receiver Gain          | 42                                                                             |
| 15 Relaxation Delay       | 2.0000                                                                         |
| 16 Pulse Width            | 7.1000                                                                         |
| 17 Acquisition Time       | 2.9098                                                                         |
| 18 Acquisition Date       | 2018-05-24T14:48:14                                                            |
| 19 Modification Date      | 2018-05-24T15:04:32                                                            |
| 20 Spectrometer Frequency | 600.17                                                                         |
| 21 Spectral Width         | 9008.5                                                                         |
| 22 Lowest Frequency       | -292.3                                                                         |
| 23 Nucleus                | 1H                                                                             |
| 24 Acquired Size          | 32768                                                                          |
| 25 Spectral Size          | 26214                                                                          |

yhj

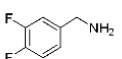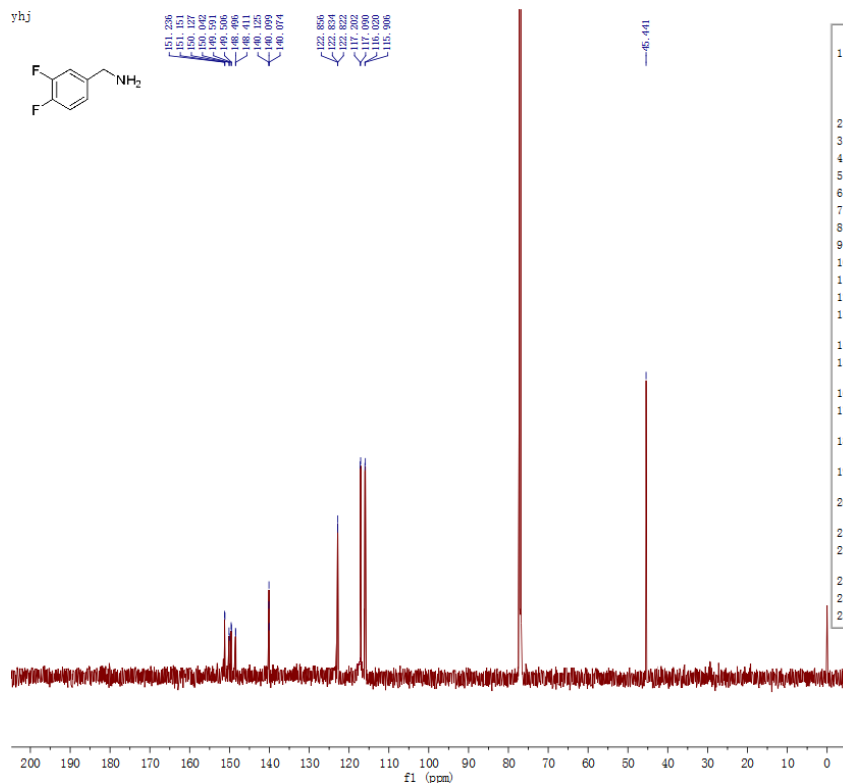

| Parameter                 | Value                                                                                     |
|---------------------------|-------------------------------------------------------------------------------------------|
| 1 Data File Name          | D:/liulei/刘磊还原核磁/刘磊-12个基谱12个碳谱/刘磊-12个基谱12个碳谱/1q1-11-180521-17xia-C-single_pulse_dec-3.jdf |
| 2 Title                   | yhj                                                                                       |
| 3 Comment                 |                                                                                           |
| 4 Origin                  | JEOL                                                                                      |
| 5 Owner                   |                                                                                           |
| 6 Site                    |                                                                                           |
| 7 Spectrometer            | ECA 600                                                                                   |
| 8 Author                  | HappyNMR                                                                                  |
| 9 Solvent                 | CHLOROFORM-D                                                                              |
| 10 Temperature            | 24.7                                                                                      |
| 11 Pulse Sequence         | single_pulse_dec                                                                          |
| 12 Experiment             | 1D                                                                                        |
| 13 Number of Scans        | 1024                                                                                      |
| 14 Receiver Gain          | 58                                                                                        |
| 15 Relaxation Delay       | 2.0000                                                                                    |
| 16 Pulse Width            | 4.0833                                                                                    |
| 17 Acquisition Time       | 0.6921                                                                                    |
| 18 Acquisition Date       | 2018-05-24T15:35:18                                                                       |
| 19 Modification Date      | 2018-05-24T15:52:26                                                                       |
| 20 Spectrometer Frequency | 150.91                                                                                    |
| 21 Spectral Width         | 37876.8                                                                                   |
| 22 Lowest Frequency       | -3855.3                                                                                   |
| 23 Nucleus                | 13C                                                                                       |
| 24 Acquired Size          | 32768                                                                                     |
| 25 Spectral Size          | 26214                                                                                     |

yhj  
single\_pulse

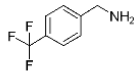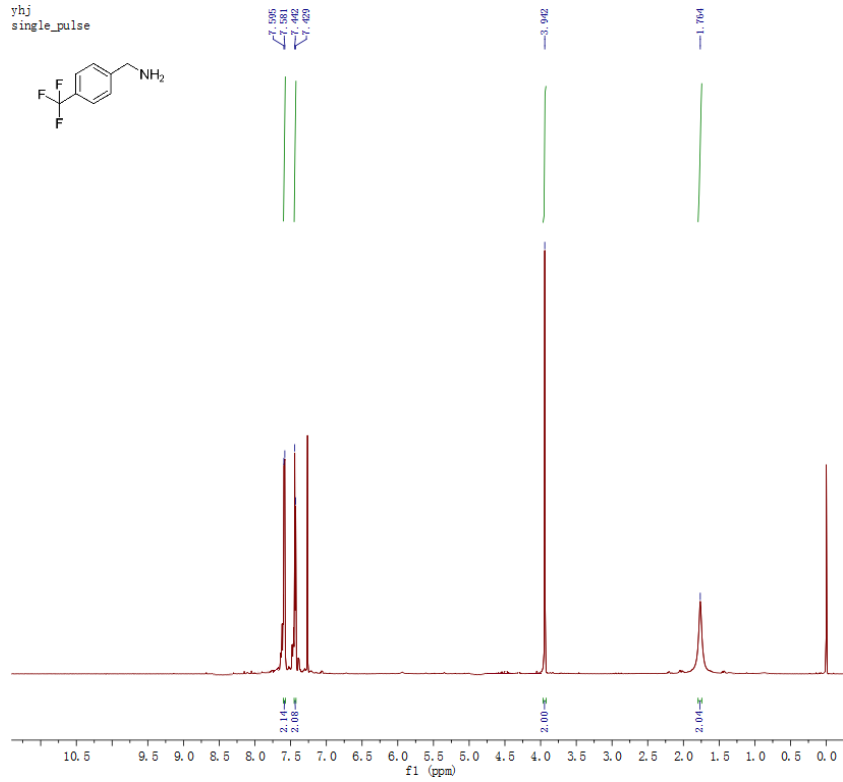

| Parameter                 | Value                                                                       |
|---------------------------|-----------------------------------------------------------------------------|
| 1 Data File Name          | D:/ liulei/ 氨基还原核磁/ Fw_thunmr-180626/ lq1-11-180625-9-H-single_pulse-3. jdf |
| 2 Title                   | yhj                                                                         |
| 3 Comment                 | single_pulse                                                                |
| 4 Origin                  | JEOL                                                                        |
| 5 Owner                   |                                                                             |
| 6 Site                    |                                                                             |
| 7 Spectrometer            | ECA 600                                                                     |
| 8 Author                  | HappyNMR                                                                    |
| 9 Solvent                 | CHLOROFORM-D                                                                |
| 10 Temperature            | 25.1                                                                        |
| 11 Pulse Sequence         | single_pulse.ex2                                                            |
| 12 Experiment             | 1D                                                                          |
| 13 Number of Scans        | 16                                                                          |
| 14 Receiver Gain          | 46                                                                          |
| 15 Relaxation Delay       | 2.0000                                                                      |
| 16 Pulse Width            | 7.1000                                                                      |
| 17 Acquisition Time       | 2.9098                                                                      |
| 18 Acquisition Date       | 2018-06-25T15:15:08                                                         |
| 19 Modification Date      | 2018-06-25T15:35:34                                                         |
| 20 Spectrometer Frequency | 600.17                                                                      |
| 21 Spectral Width         | 9008.5                                                                      |
| 22 Lowest Frequency       | -295.3                                                                      |
| 23 Nucleus                | 1H                                                                          |
| 24 Acquired Size          | 32768                                                                       |
| 25 Spectral Size          | 26214                                                                       |

yhj

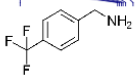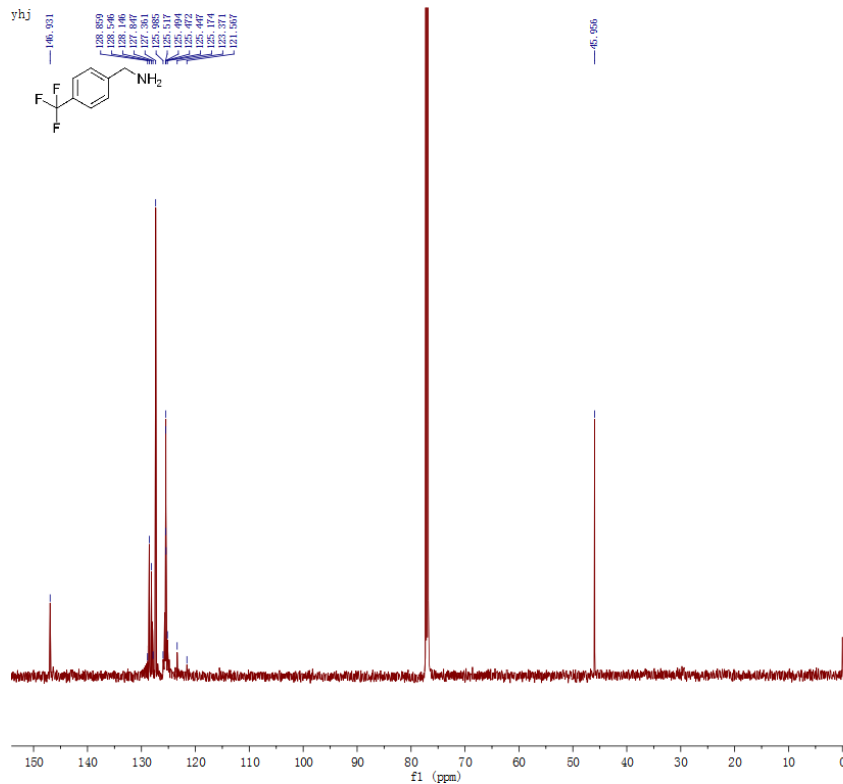

| Parameter                 | Value                                                                           |
|---------------------------|---------------------------------------------------------------------------------|
| 1 Data File Name          | D:/ liulei/ 氨基还原核磁/ Fw_thunmr-180626/ lq1-11-180625-9-C-single_pulse_dec-3. jdf |
| 2 Title                   | yhj                                                                             |
| 3 Comment                 |                                                                                 |
| 4 Origin                  | JEOL                                                                            |
| 5 Owner                   |                                                                                 |
| 6 Site                    |                                                                                 |
| 7 Spectrometer            | ECA 600                                                                         |
| 8 Author                  | HappyNMR                                                                        |
| 9 Solvent                 | CHLOROFORM-D                                                                    |
| 10 Temperature            | 26.7                                                                            |
| 11 Pulse Sequence         | single_pulse_dec                                                                |
| 12 Experiment             | 1D                                                                              |
| 13 Number of Scans        | 1024                                                                            |
| 14 Receiver Gain          | 56                                                                              |
| 15 Relaxation Delay       | 2.0000                                                                          |
| 16 Pulse Width            | 4.0833                                                                          |
| 17 Acquisition Time       | 0.6921                                                                          |
| 18 Acquisition Date       | 2018-06-25T16:09:08                                                             |
| 19 Modification Date      | 2018-06-25T16:28:54                                                             |
| 20 Spectrometer Frequency | 150.91                                                                          |
| 21 Spectral Width         | 37876.8                                                                         |
| 22 Lowest Frequency       | -3853.7                                                                         |
| 23 Nucleus                | 13C                                                                             |
| 24 Acquired Size          | 32768                                                                           |
| 25 Spectral Size          | 26214                                                                           |

yhj  
single\_pulse

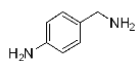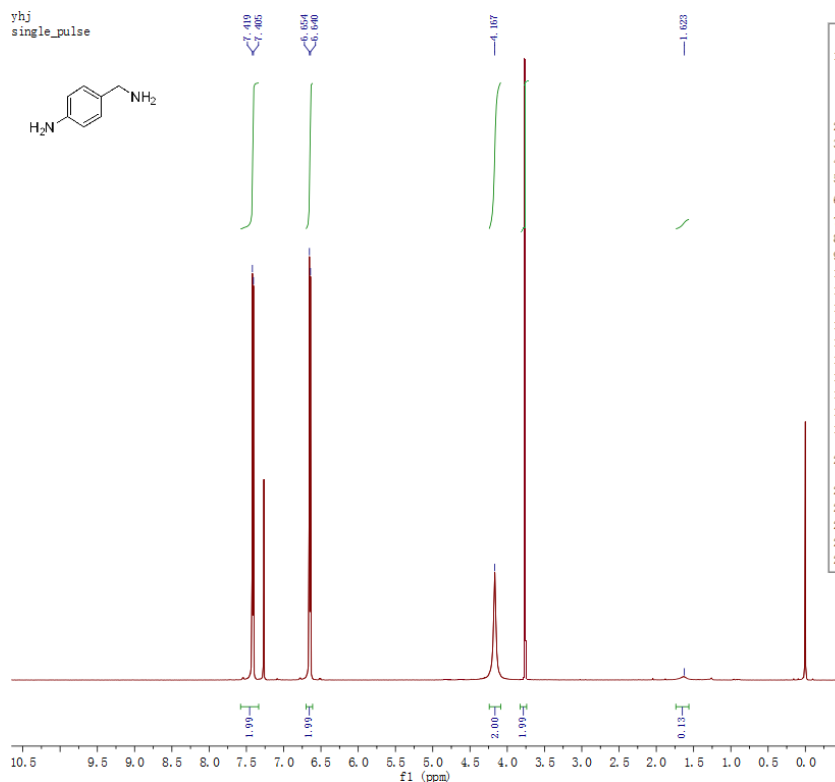

| Parameter                 | Value                                                                                     |
|---------------------------|-------------------------------------------------------------------------------------------|
| 1 Data File Name          | D:/ liulei/ 艾永建-12个氨基-12个碳谱 / 艾永建-12个氨基-12个碳谱 / 141-ayj-180515-15xia-H-single_pulse-3.jdf |
| 2 Title                   | yhj                                                                                       |
| 3 Comment                 | single_pulse                                                                              |
| 4 Origin                  | JEOL                                                                                      |
| 5 Owner                   |                                                                                           |
| 6 Site                    |                                                                                           |
| 7 Spectrometer            | ECA 600                                                                                   |
| 8 Author                  | HappyNMR                                                                                  |
| 9 Solvent                 | CHLOROFORM-D                                                                              |
| 10 Temperature            | 23.7                                                                                      |
| 11 Pulse Sequence         | single_pulse.ex2                                                                          |
| 12 Experiment             | 1D                                                                                        |
| 13 Number of Scans        | 16                                                                                        |
| 14 Receiver Gain          | 46                                                                                        |
| 15 Relaxation Delay       | 2.0000                                                                                    |
| 16 Pulse Width            | 7.1000                                                                                    |
| 17 Acquisition Time       | 2.9098                                                                                    |
| 18 Acquisition Date       | 2018-05-17T13:50:33                                                                       |
| 19 Modification Date      | 2018-05-17T14:08:04                                                                       |
| 20 Spectrometer Frequency | 600.17                                                                                    |
| 21 Spectral Width         | 9008.5                                                                                    |
| 22 Lowest Frequency       | -294.1                                                                                    |
| 23 Nucleus                | 1H                                                                                        |
| 24 Acquired Size          | 32768                                                                                     |
| 25 Spectral Size          | 26214                                                                                     |

yhj

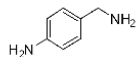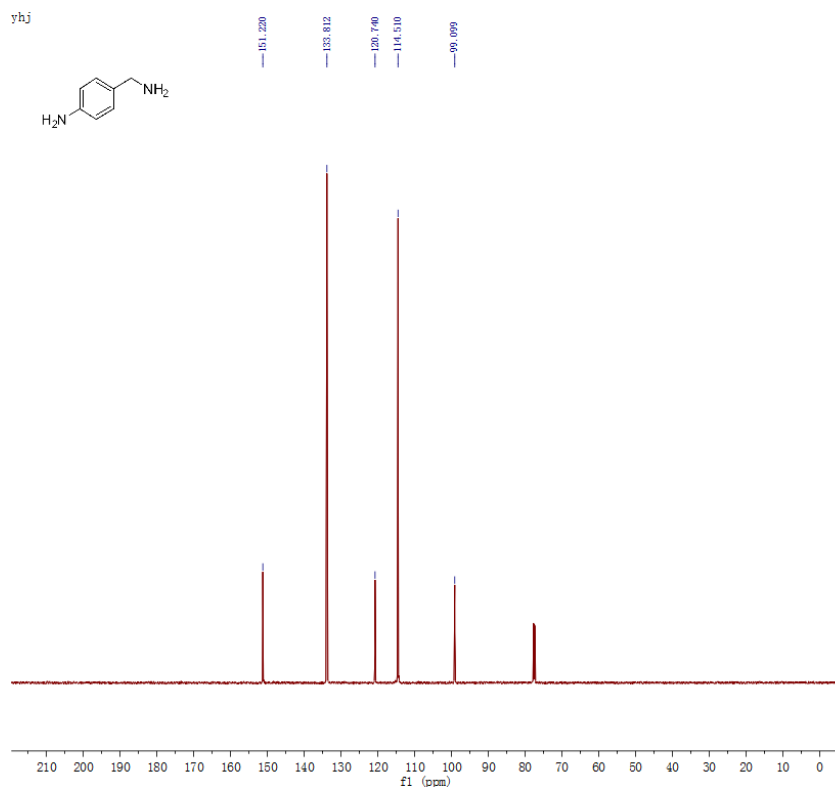

| Parameter                 | Value                                                                                         |
|---------------------------|-----------------------------------------------------------------------------------------------|
| 1 Data File Name          | D:/ liulei/ 艾永建-12个氨基-12个碳谱 / 艾永建-12个氨基-12个碳谱 / 141-ayj-180515-15xia-C-single_pulse_dec-2.jdf |
| 2 Title                   | yhj                                                                                           |
| 3 Comment                 |                                                                                               |
| 4 Origin                  | JEOL                                                                                          |
| 5 Owner                   |                                                                                               |
| 6 Site                    |                                                                                               |
| 7 Spectrometer            | ECA 600                                                                                       |
| 8 Author                  | HappyNMR                                                                                      |
| 9 Solvent                 | CHLOROFORM-D                                                                                  |
| 10 Temperature            | 24.9                                                                                          |
| 11 Pulse Sequence         | single_pulse_dec                                                                              |
| 12 Experiment             | 1D                                                                                            |
| 13 Number of Scans        | 211                                                                                           |
| 14 Receiver Gain          | 56                                                                                            |
| 15 Relaxation Delay       | 2.0000                                                                                        |
| 16 Pulse Width            | 4.0833                                                                                        |
| 17 Acquisition Time       | 0.6921                                                                                        |
| 18 Acquisition Date       | 2018-05-17T14:02:37                                                                           |
| 19 Modification Date      | 2018-05-17T14:18:16                                                                           |
| 20 Spectrometer Frequency | 150.91                                                                                        |
| 21 Spectral Width         | 37876.6                                                                                       |
| 22 Lowest Frequency       | -3847.0                                                                                       |
| 23 Nucleus                | 13C                                                                                           |
| 24 Acquired Size          | 32768                                                                                         |
| 25 Spectral Size          | 26214                                                                                         |

yhj  
single\_pulse

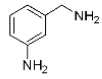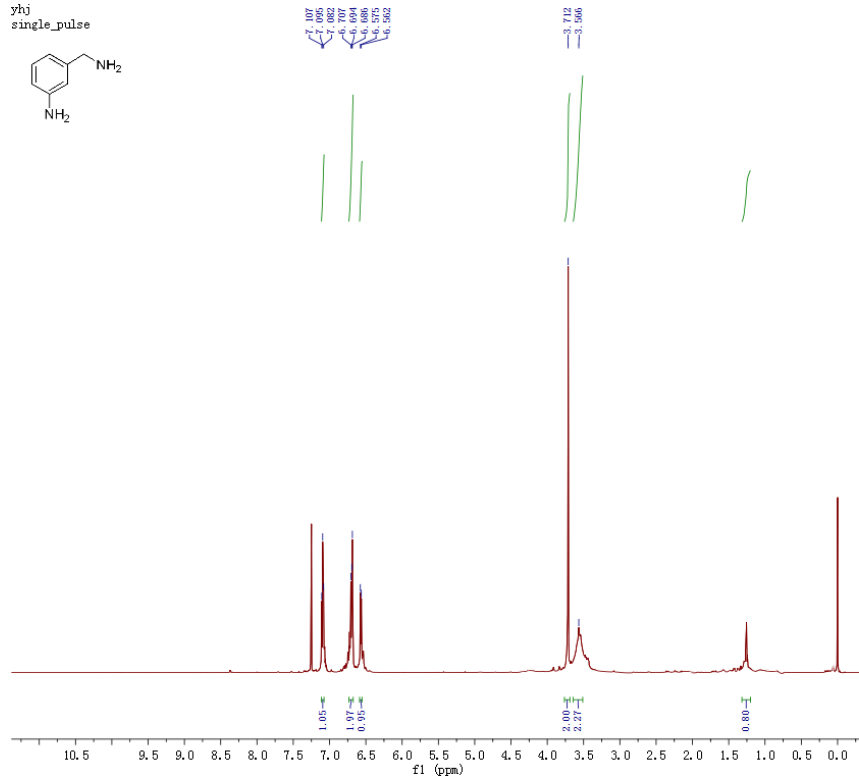

| Parameter                 | Value                                                                          |
|---------------------------|--------------------------------------------------------------------------------|
| 1 Data File Name          | D:/11ulei/刘磊-12个氢谱12个碳谱/刘磊-12个氢谱12个碳谱/14l-11-180521-14xia-M-single_pulse-3.jdf |
| 2 Title                   | yhj                                                                            |
| 3 Comment                 | single_pulse                                                                   |
| 4 Origin                  | JEOL                                                                           |
| 5 Owner                   |                                                                                |
| 6 Site                    |                                                                                |
| 7 Spectrometer            | ECA 600                                                                        |
| 8 Author                  | HappyNMR                                                                       |
| 9 Solvent                 | CHLOROFORM-D                                                                   |
| 10 Temperature            | 23.6                                                                           |
| 11 Pulse Sequence         | single_pulse.en2                                                               |
| 12 Experiment             | 1D                                                                             |
| 13 Number of Scans        | 16                                                                             |
| 14 Receiver Gain          | 38                                                                             |
| 15 Relaxation Delay       | 2.0000                                                                         |
| 16 Pulse Width            | 7.1000                                                                         |
| 17 Acquisition Time       | 2.9098                                                                         |
| 18 Acquisition Date       | 2018-05-22T12:04:52                                                            |
| 19 Modification Date      | 2018-05-22T13:16:27                                                            |
| 20 Spectrometer Frequency | 600.17                                                                         |
| 21 Spectral Width         | 9008.5                                                                         |
| 22 Lowest Frequency       | -303.1                                                                         |
| 23 Nucleus                | 1H                                                                             |
| 24 Acquired Size          | 32768                                                                          |
| 25 Spectral Size          | 26214                                                                          |

yhj

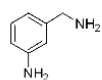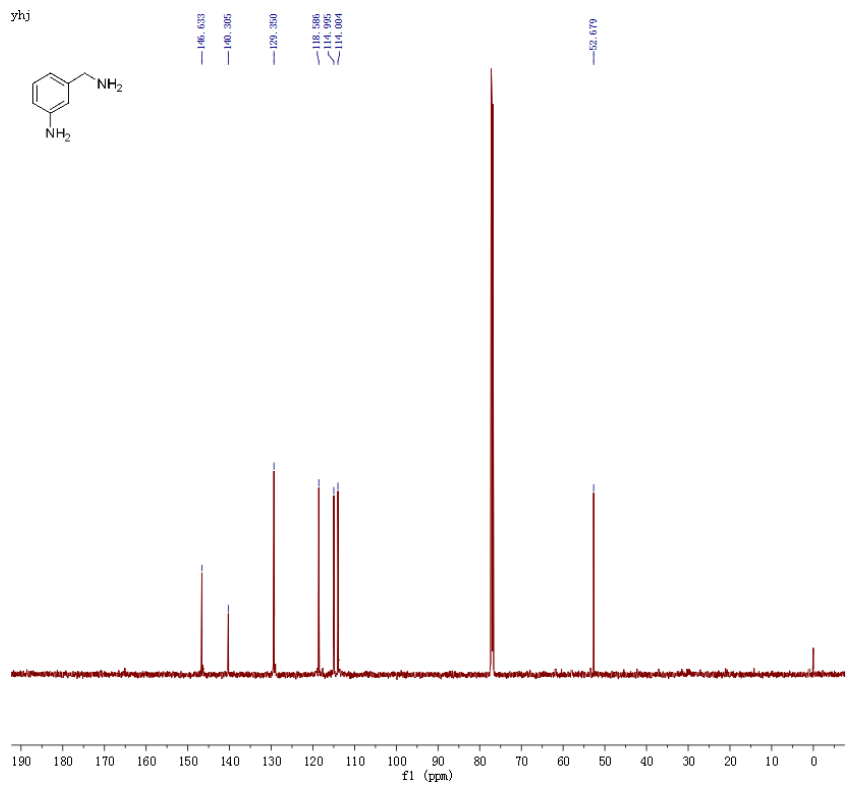

| Parameter                 | Value                                                                              |
|---------------------------|------------------------------------------------------------------------------------|
| 1 Data File Name          | D:/11ulei/刘磊-12个氢谱12个碳谱/刘磊-12个氢谱12个碳谱/14l-11-180521-14xia-C-single_pulse_dec-3.jdf |
| 2 Title                   | yhj                                                                                |
| 3 Comment                 |                                                                                    |
| 4 Origin                  | JEOL                                                                               |
| 5 Owner                   |                                                                                    |
| 6 Site                    |                                                                                    |
| 7 Spectrometer            | ECA 600                                                                            |
| 8 Author                  | HappyNMR                                                                           |
| 9 Solvent                 | CHLOROFORM-D                                                                       |
| 10 Temperature            | 24.3                                                                               |
| 11 Pulse Sequence         | single_pulse_dec                                                                   |
| 12 Experiment             | 1D                                                                                 |
| 13 Number of Scans        | 1024                                                                               |
| 14 Receiver Gain          | 58                                                                                 |
| 15 Relaxation Delay       | 2.0000                                                                             |
| 16 Pulse Width            | 4.0833                                                                             |
| 17 Acquisition Time       | 0.6921                                                                             |
| 18 Acquisition Date       | 2018-05-22T12:02:53                                                                |
| 19 Modification Date      | 2018-05-22T13:16:34                                                                |
| 20 Spectrometer Frequency | 150.91                                                                             |
| 21 Spectral Width         | 37876.8                                                                            |
| 22 Lowest Frequency       | -3862.4                                                                            |
| 23 Nucleus                | 13C                                                                                |
| 24 Acquired Size          | 32768                                                                              |
| 25 Spectral Size          | 26214                                                                              |

yhj  
single\_pulse

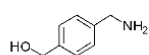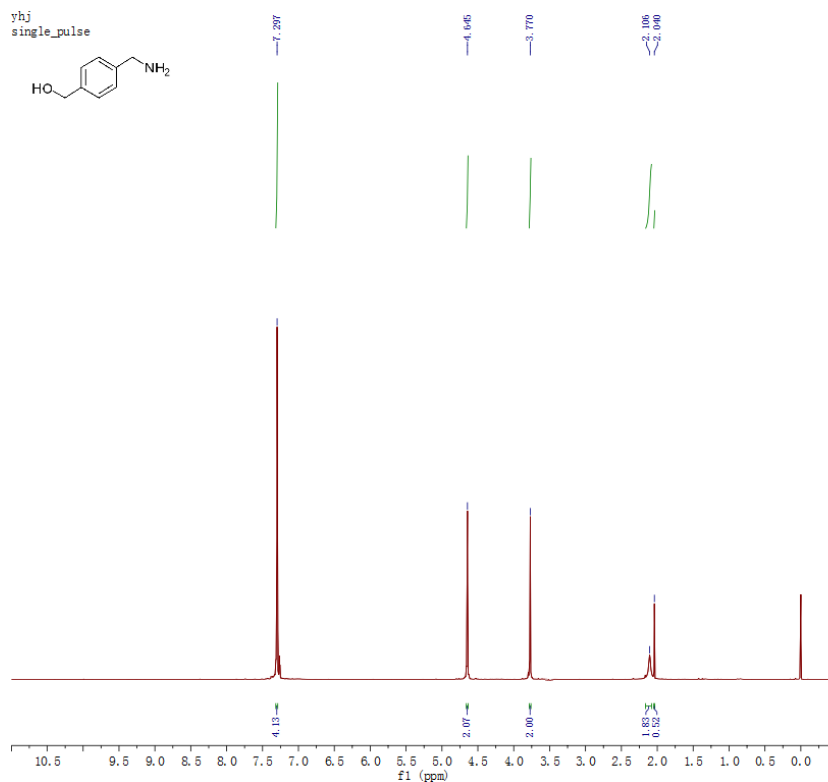

| Parameter                 | Value                                                                              |
|---------------------------|------------------------------------------------------------------------------------|
| 1 Data File Name          | D:/ liulei/ 刘磊-12个基谱12个基谱/ 刘磊-12个基谱12个基谱/ lql-11-180521-20xia-h-single_pulse-3.jdf |
| 2 Title                   | yhj                                                                                |
| 3 Comment                 | single_pulse                                                                       |
| 4 Origin                  | JEOL                                                                               |
| 5 Owner                   |                                                                                    |
| 6 Site                    |                                                                                    |
| 7 Spectrometer            | ECA 600                                                                            |
| 8 Author                  | HappyNMR                                                                           |
| 9 Solvent                 | CHLOROFORM-D                                                                       |
| 10 Temperature            | 23.8                                                                               |
| 11 Pulse Sequence         | single_pulse.ex2                                                                   |
| 12 Experiment             | 1D                                                                                 |
| 13 Number of Scans        | 16                                                                                 |
| 14 Receiver Gain          | 42                                                                                 |
| 15 Relaxation Delay       | 2.0000                                                                             |
| 16 Pulse Width            | 7.1000                                                                             |
| 17 Acquisition Time       | 2.9098                                                                             |
| 18 Acquisition Date       | 2018-05-25T08:09:24                                                                |
| 19 Modification Date      | 2018-05-25T08:26:06                                                                |
| 20 Spectrometer Frequency | 600.17                                                                             |
| 21 Spectral Width         | 9008.5                                                                             |
| 22 Lowest Frequency       | -297.7                                                                             |
| 23 Nucleus                | 1H                                                                                 |
| 24 Acquired Size          | 32768                                                                              |
| 25 Spectral Size          | 28214                                                                              |

yhj

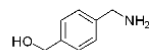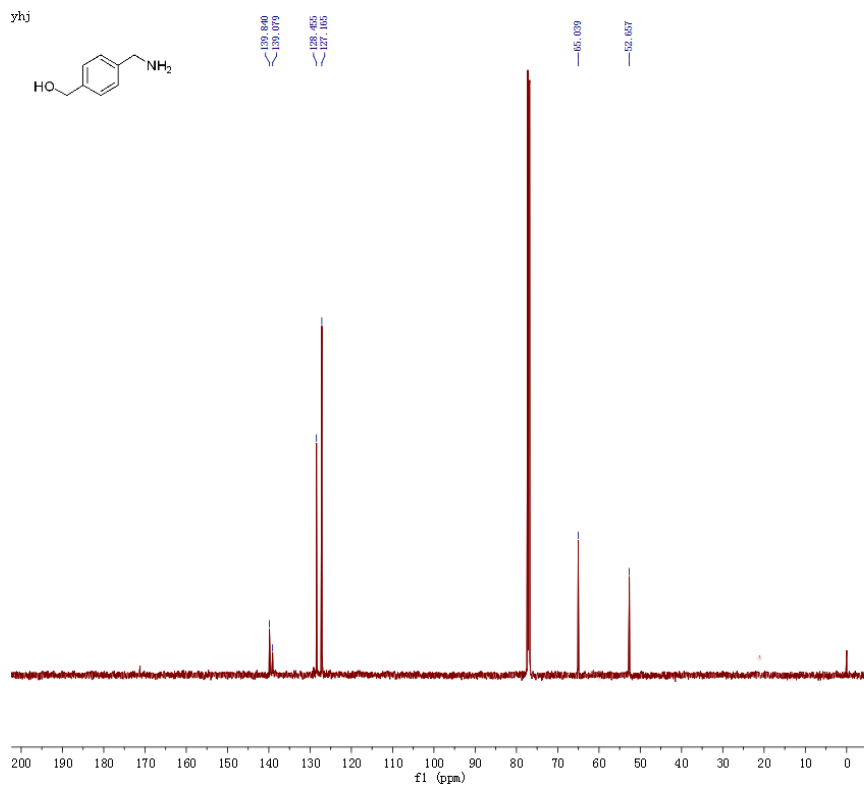

| Parameter                 | Value                                                                                  |
|---------------------------|----------------------------------------------------------------------------------------|
| 1 Data File Name          | D:/ liulei/ 刘磊-12个基谱12个基谱/ 刘磊-12个基谱12个基谱/ lql-11-180521-20xia-h-single_pulse_dec-3.jdf |
| 2 Title                   | yhj                                                                                    |
| 3 Comment                 |                                                                                        |
| 4 Origin                  | JEOL                                                                                   |
| 5 Owner                   |                                                                                        |
| 6 Site                    |                                                                                        |
| 7 Spectrometer            | ECA 600                                                                                |
| 8 Author                  | HappyNMR                                                                               |
| 9 Solvent                 | CHLOROFORM-D                                                                           |
| 10 Temperature            | 25.0                                                                                   |
| 11 Pulse Sequence         | single_pulse_dec                                                                       |
| 12 Experiment             | 1D                                                                                     |
| 13 Number of Scans        | 613                                                                                    |
| 14 Receiver Gain          | 58                                                                                     |
| 15 Relaxation Delay       | 2.0000                                                                                 |
| 16 Pulse Width            | 4.0833                                                                                 |
| 17 Acquisition Time       | 0.6921                                                                                 |
| 18 Acquisition Date       | 2018-05-25T08:46:30                                                                    |
| 19 Modification Date      | 2018-05-25T09:02:56                                                                    |
| 20 Spectrometer Frequency | 150.91                                                                                 |
| 21 Spectral Width         | 37876.8                                                                                |
| 22 Lowest Frequency       | -3859.6                                                                                |
| 23 Nucleus                | 13C                                                                                    |
| 24 Acquired Size          | 32768                                                                                  |
| 25 Spectral Size          | 28214                                                                                  |

yhj  
single\_pulse

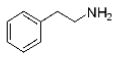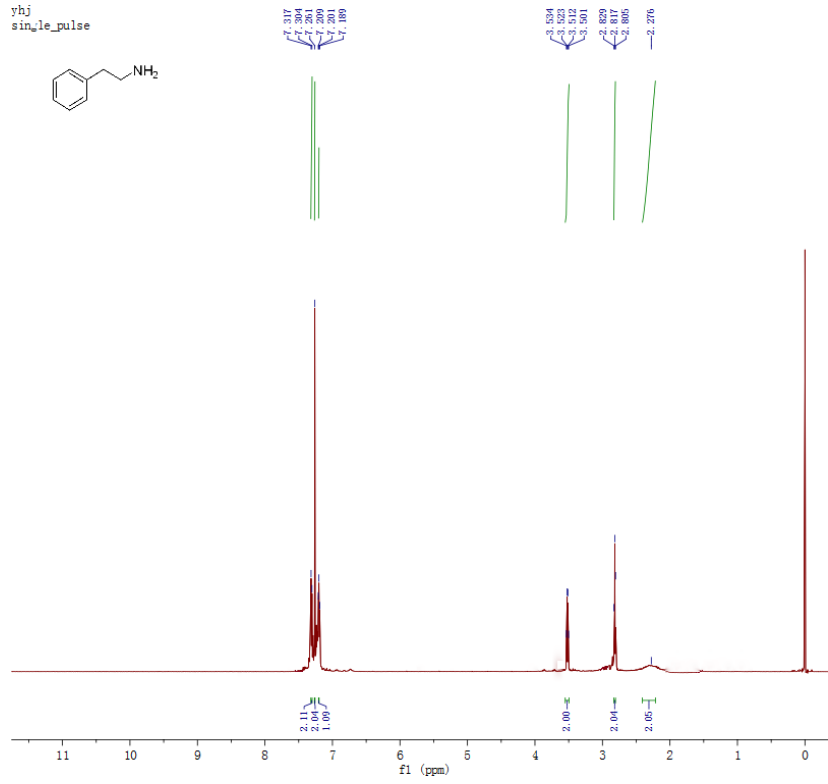

| Parameter                 | Value                                                                          |
|---------------------------|--------------------------------------------------------------------------------|
| 1 Data File Name          | D:/liulei/刘磊-12个碳谱12个碳谱/刘磊-12个碳谱12个碳谱/lq1-11-180521-16sia-H-single_pulse-3.jdf |
| 2 Title                   | yhj                                                                            |
| 3 Comment                 | single_pulse                                                                   |
| 4 Origin                  | JEOL                                                                           |
| 5 Owner                   |                                                                                |
| 6 Site                    |                                                                                |
| 7 Spectrometer            | ECA 600                                                                        |
| 8 Author                  | HappyNMR                                                                       |
| 9 Solvent                 | CHLOROFORM-D                                                                   |
| 10 Temperature            | 23.1                                                                           |
| 11 Pulse Sequence         | single_pulse.ex2                                                               |
| 12 Experiment             | 1D                                                                             |
| 13 Number of Scans        | 16                                                                             |
| 14 Receiver Gain          | 44                                                                             |
| 15 Relaxation Delay       | 2.0000                                                                         |
| 16 Pulse Width            | 7.1000                                                                         |
| 17 Acquisition Time       | 2.9098                                                                         |
| 18 Acquisition Date       | 2018-05-23T12:53:32                                                            |
| 19 Modification Date      | 2018-05-23T13:17:17                                                            |
| 20 Spectrometer Frequency | 600.17                                                                         |
| 21 Spectral Width         | 9008.5                                                                         |
| 22 Lowest Frequency       | -296.5                                                                         |
| 23 Nucleus                | 1H                                                                             |
| 24 Acquired Size          | 32768                                                                          |
| 25 Spectral Size          | 26214                                                                          |

yhj

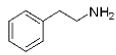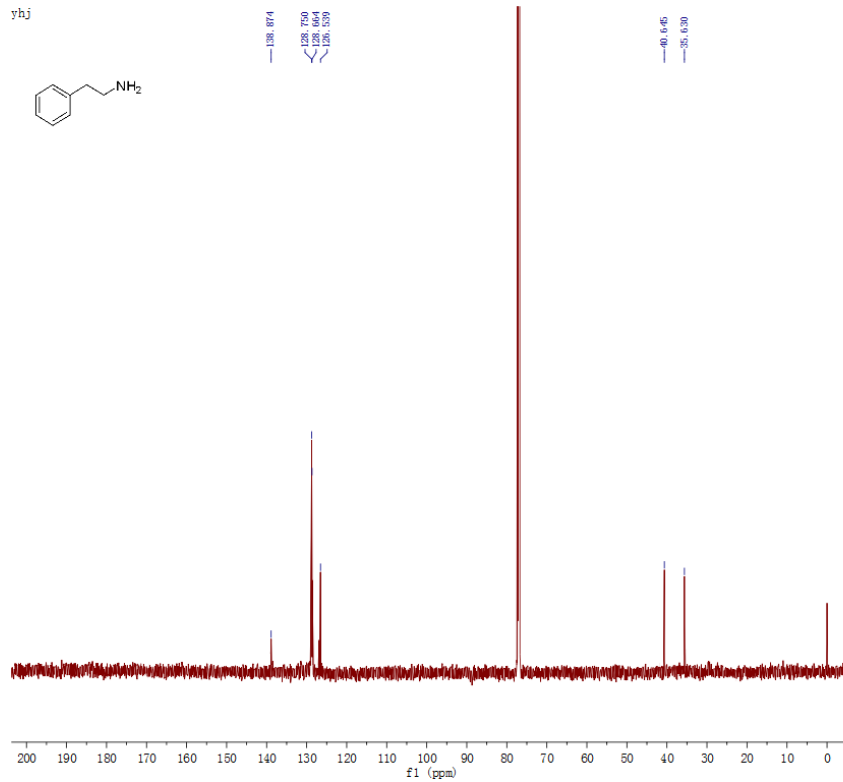

| Parameter                 | Value                                                                              |
|---------------------------|------------------------------------------------------------------------------------|
| 1 Data File Name          | D:/liulei/刘磊-12个碳谱12个碳谱/刘磊-12个碳谱12个碳谱/lq1-11-180521-16sia-C-single_pulse_dec-3.jdf |
| 2 Title                   | yhj                                                                                |
| 3 Comment                 |                                                                                    |
| 4 Origin                  | JEOL                                                                               |
| 5 Owner                   |                                                                                    |
| 6 Site                    |                                                                                    |
| 7 Spectrometer            | ECA 600                                                                            |
| 8 Author                  | HappyNMR                                                                           |
| 9 Solvent                 | CHLOROFORM-D                                                                       |
| 10 Temperature            | 24.5                                                                               |
| 11 Pulse Sequence         | single_pulse_dec                                                                   |
| 12 Experiment             | 1D                                                                                 |
| 13 Number of Scans        | 1024                                                                               |
| 14 Receiver Gain          | 58                                                                                 |
| 15 Relaxation Delay       | 2.0000                                                                             |
| 16 Pulse Width            | 4.0833                                                                             |
| 17 Acquisition Time       | 0.6921                                                                             |
| 18 Acquisition Date       | 2018-05-23T13:40:06                                                                |
| 19 Modification Date      | 2018-05-23T13:56:50                                                                |
| 20 Spectrometer Frequency | 150.91                                                                             |
| 21 Spectral Width         | 37876.8                                                                            |
| 22 Lowest Frequency       | -3859.1                                                                            |
| 23 Nucleus                | 13C                                                                                |
| 24 Acquired Size          | 32768                                                                              |
| 25 Spectral Size          | 26214                                                                              |



## Reference

1. R. Adam, C. B. Bheeter, J. R. Cabrero-Antonino, K. Junge, R. Jackstell and M. Beller, *Chemsuschem*, 2017, **10**, 842-846.
2. K. Tokmic, B. J. Jackson, A. Salazar, T. J. Woods and A. R. Fout, *J. Am. Chem. Soc.*, 2017, **139**, 13554-13561.
3. R. Adam, E. Alberico, W. Baumann, H.-J. Drexler, R. Jackstell, H. Junge and M. Beller, *Chem. Eur. J.*, 2016, **22**, 4991-5002.
